# Supplementary material for: Ecological Sustainability Assessment of Water Distribution for the Maintenance of Ecosystems, their Services and Biodiversity
Source: Springer Nature journal article supplement (doi:10.1007/s00267-022-01662-3), 2022-06-14
Supplement: MOESM2 [file 23162354]

## Environmental Management

### **Ecological sustainability assessment of water distribution for the maintenance of ecosystems, their services and biodiversity**

Anna Schlattmann<sup>1</sup>, Felix Neuendorf, Kremena Burkhard, Elisabeth Probst, Estanislao Pujades, Wolfram Mauser, Sabine Attinger, Christina von Haaren

<sup>1</sup>Leibniz University Hannover, Institute of Environmental Planning, Herrenhaeuserstr. 2, 30419 Hannover, Germany, schlattmann@umwelt.uni-hannover.de

#### **Online Resource 2: Overlay rules for EWD typology**

| <b>PROMET</b> | <b>GLC</b> | <b>GLWD</b> | <b>Ramsar</b>                                                                   | <b>PROMET value</b> | <b>GLC value</b> | <b>GLWD value</b> | <b>RAMSAR value</b> | <b>EWD value</b> |
|---------------|------------|-------------|---------------------------------------------------------------------------------|---------------------|------------------|-------------------|---------------------|------------------|
| Water         |            |             | Human-made wetlands, 2:<br>Ponds                                                | 0                   | 0                | 0                 | 2                   | 78               |
| Water         |            |             | Humand-made wetlands, 5:<br>Salt exploitation sites                             | 0                   | 0                | 0                 | 5                   | 78               |
| Water         |            |             | Human-made wetlands, 6:<br>Water storage areas                                  | 0                   | 0                | 0                 | 6                   | 78               |
| Water         |            |             | Humand-made wetlands, 7:<br>Excavations                                         | 0                   | 0                | 0                 | 7                   | 78               |
| Water         |            |             | Humand-made wetlands, 8:<br>Wastewater treatment areas                          | 0                   | 0                | 0                 | 8                   | 78               |
| Water         |            |             | Human-made wetlands, 9:<br>Canals and drainage channels<br>or ditches           | 0                   | 0                | 0                 | 9                   | 78               |
|               |            |             | Inland wetlands, Zk(b): Karst<br>and other subterrenean<br>hydrological systems | 0                   | 0                | 0                 | Zk(b)               | 77               |

|       |                                            |      |                                                                                                                                                                                                                                                                      |   |   |   |       |    |
|-------|--------------------------------------------|------|----------------------------------------------------------------------------------------------------------------------------------------------------------------------------------------------------------------------------------------------------------------------|---|---|---|-------|----|
| Water |                                            |      | Human-made wetlands, Zk(c):<br>Karst and other subterranean hydrological systems                                                                                                                                                                                     | 0 | 0 | 0 | Zk(c) | 78 |
| NA    | Tree Cover, broadleaved, deciduous, closed |      |                                                                                                                                                                                                                                                                      | 0 | 2 | 0 | 0     | 62 |
| NA    | Tree Cover, broadleaved, deciduous, closed | Lake |                                                                                                                                                                                                                                                                      | 0 | 2 | 1 | 0     | 41 |
| NA    | Tree Cover, needle-leaved, evergreen       |      |                                                                                                                                                                                                                                                                      | 0 | 4 | 0 | 0     | 66 |
| NA    | Tree Cover, needle-leaved, evergreen       |      | Marine or coastal wetlands, E:<br>Sand, shingle or pebble shores,<br>F: Estuarine waters, Inland wetlands, M: Permanent rivers/ streams/ creeks, O: Permanent freshwater lakes, P: Seasonal/ intermittent freshwater lakes, Tp: Permanent freshwater marshes/ pools, | 0 | 4 | 0 | E     | 80 |

|    |                                      |                 |                                                                                                                                                                                                                                                                |   |   |   |   |    |
|----|--------------------------------------|-----------------|----------------------------------------------------------------------------------------------------------------------------------------------------------------------------------------------------------------------------------------------------------------|---|---|---|---|----|
| NA | Tree Cover, needle-leaved, evergreen |                 | Marine or coastal wetlands, J: Coastal brackish / saline lagoons, H: Intertidal marshes, F: Estuarine waters, E: Sand, shingle or pebble shores, G: Intertidal mud, sand or salt flats, Inland wetlands, Tp: Permanent freshwater marshes/ pools               | 0 | 4 | 0 | J | 80 |
| NA | Tree Cover, needle-leaved, evergreen | Lake            |                                                                                                                                                                                                                                                                | 0 | 4 | 1 | 0 | 41 |
| NA | Tree Cover, needle-leaved, evergreen | Coastal Wetland |                                                                                                                                                                                                                                                                | 0 | 4 | 6 | 0 | 80 |
| NA | Tree Cover, needle-leaved, evergreen | Coastal Wetland | Marine or coastal wetlands, E: Sand, shingle or pebble shores, F: Estuarine waters, Inland wetlands, M: Permanent rivers/ streams/ creeks, O: Permanent freshwater lakes, P: Seasonal/ intermittent freshwater lakes, Tp: Permanent freshwater marshes/ pools, | 0 | 4 | 6 | E | 80 |
| NA | Tree Cover, mixed leaf type          |                 |                                                                                                                                                                                                                                                                | 0 | 6 | 0 | 0 | 68 |
| NA | Tree Cover, mixed leaf type          | Coastal Wetland |                                                                                                                                                                                                                                                                | 0 | 6 | 5 | 0 | 80 |

|    |                                           |                 |                                                                                                                                                                                                                                                                          |   |    |   |   |    |
|----|-------------------------------------------|-----------------|--------------------------------------------------------------------------------------------------------------------------------------------------------------------------------------------------------------------------------------------------------------------------|---|----|---|---|----|
| NA | Shrub Cover,<br>closed-open,<br>evergreen |                 |                                                                                                                                                                                                                                                                          | 0 | 11 | 0 | 0 | 59 |
| NA | Shrub Cover,<br>closed-open,<br>evergreen |                 | Marine or coastal wetlands, J:<br>Coastal brackish / saline<br>lagoons, H: Intertidal marshes,<br>F: Estuarine waters, E: Sand,<br>shingle or pebble shores, G:<br>Intertidal mud, sand or salt<br>flats, Inland wetlands, Tp:<br>Permanent freshwater<br>marshes/ pools | 0 | 11 | 0 | J | 80 |
| NA | Shrub Cover,<br>closed-open,<br>evergreen | Lake            |                                                                                                                                                                                                                                                                          | 0 | 11 | 1 | 0 | 41 |
| NA | Shrub Cover,<br>closed-open,<br>evergreen | Coastal Wetland |                                                                                                                                                                                                                                                                          | 0 | 11 | 5 | 0 | 80 |
| NA | Shrub Cover,<br>closed-open,<br>deciduous |                 |                                                                                                                                                                                                                                                                          | 0 | 12 | 0 | 0 | 59 |
| NA | Shrub Cover,<br>closed-open,<br>deciduous |                 | Marine or coastal wetlands, J:<br>Coastal brackish / saline<br>lagoons, H: Intertidal marshes,<br>F: Estuarine waters, E: Sand,<br>shingle or pebble shores, G:<br>Intertidal mud, sand or salt<br>flats, Inland wetlands, Tp:<br>Permanent freshwater<br>marshes/ pools | 0 | 12 | 0 | J | 80 |

|    |                                                 |                 |                                                                                                                                                                                                                                                  |   |    |   |   |    |
|----|-------------------------------------------------|-----------------|--------------------------------------------------------------------------------------------------------------------------------------------------------------------------------------------------------------------------------------------------|---|----|---|---|----|
| NA | Shrub Cover, closed-open, deciduous             | Lake            |                                                                                                                                                                                                                                                  | 0 | 12 | 1 | 0 | 41 |
| NA | Herbaceous Cover, closed-open                   |                 |                                                                                                                                                                                                                                                  | 0 | 13 | 0 | 0 | 56 |
| NA | Herbaceous Cover, closed-open                   |                 | Marine or coastal wetlands, H: Intertidal marshes, J: Coastal brackish / saline lagoons, Human-made wetlands, 9: Canals and drainage channels or ditches                                                                                         | 0 | 13 | 0 | H | 80 |
| NA | Herbaceous Cover, closed-open                   |                 | Marine or coastal wetlands, J: Coastal brackish / saline lagoons, H: Intertidal marshes, F: Estuarine waters, E: Sand, shingle or pebble shores, G: Intertidal mud, sand or salt flats, Inland wetlands, Tp: Permanent freshwater marshes/ pools | 0 | 13 | 0 | J | 80 |
| NA | Herbaceous Cover, closed-open                   | Coastal Wetland |                                                                                                                                                                                                                                                  | 0 | 13 | 5 | 0 | 80 |
| NA | Regularly flooded shrub and/or herbaceous cover |                 |                                                                                                                                                                                                                                                  | 0 | 15 | 0 | 0 | 57 |

|    |                                                 |                 |                                                                                                                                                                                                                                                                |   |    |   |   |    |
|----|-------------------------------------------------|-----------------|----------------------------------------------------------------------------------------------------------------------------------------------------------------------------------------------------------------------------------------------------------------|---|----|---|---|----|
| NA | Regularly flooded shrub and/or herbaceous cover | Lake            |                                                                                                                                                                                                                                                                | 0 | 15 | 1 | 0 | 60 |
| NA | Regularly flooded shrub and/or herbaceous cover | Coastal Wetland |                                                                                                                                                                                                                                                                | 0 | 15 | 5 | 0 | 80 |
|    | Cultivated and managed areas                    |                 |                                                                                                                                                                                                                                                                | 0 | 16 | 0 | 0 | 74 |
| NA | Cultivated and managed areas                    |                 |                                                                                                                                                                                                                                                                | 0 | 16 | 0 | 0 | 74 |
| NA | Cultivated and managed areas                    |                 | Marine or coastal wetlands, E: Sand, shingle or pebble shores, F: Estuarine waters, Inland wetlands, M: Permanent rivers/ streams/ creeks, O: Permanent freshwater lakes, P: Seasonal/ intermittent freshwater lakes, Tp: Permanent freshwater marshes/ pools, | 0 | 16 | 0 | E | 80 |

|    |                                             |                 |                                                                                                                                                                                                                                                                |   |    |   |   |    |
|----|---------------------------------------------|-----------------|----------------------------------------------------------------------------------------------------------------------------------------------------------------------------------------------------------------------------------------------------------------|---|----|---|---|----|
| NA | Cultivated and managed areas                |                 | Marine or coastal wetlands, J: Coastal brackish / saline lagoons, H: Intertidal marshes, F: Estuarine waters, E: Sand, shingle or pebble shores, G: Intertidal mud, sand or salt flats, Inland wetlands, Tp: Permanent freshwater marshes/ pools               | 0 | 16 | 0 | J | 80 |
| NA | Cultivated and managed areas                | Lake            |                                                                                                                                                                                                                                                                | 0 | 16 | 1 | 0 | 41 |
| NA | Cultivated and managed areas                | Coastal Wetland |                                                                                                                                                                                                                                                                | 0 | 16 | 5 | 0 | 80 |
| NA | Cultivated and managed areas                | Coastal Wetland | Marine or coastal wetlands, E: Sand, shingle or pebble shores, F: Estuarine waters, Inland wetlands, M: Permanent rivers/ streams/ creeks, O: Permanent freshwater lakes, P: Seasonal/ intermittent freshwater lakes, Tp: Permanent freshwater marshes/ pools, | 0 | 16 | 5 | E | 80 |
| NA | Mosaic: Cropland / Shrub and/or grass cover |                 |                                                                                                                                                                                                                                                                | 0 | 18 | 0 | 0 | 74 |
| NA | Bare Areas                                  |                 |                                                                                                                                                                                                                                                                | 0 | 19 | 0 | 0 | 79 |
| NA | Bare Areas                                  | Lake            |                                                                                                                                                                                                                                                                | 0 | 19 | 1 | 0 | 41 |
| NA | Bare Areas                                  | Coastal Wetland |                                                                                                                                                                                                                                                                | 0 | 19 | 5 | 0 | 80 |

|    |              |  |                                                                                                                                                                                                                                                                |   |    |   |   |    |
|----|--------------|--|----------------------------------------------------------------------------------------------------------------------------------------------------------------------------------------------------------------------------------------------------------------|---|----|---|---|----|
| NA | Water Bodies |  | Human-made wetlands, 3: Irrigated land, Marine or coastal wetlands, E: Sand, shingle or pebble shores, J: Coastal brackish / saline lagoons, Inland wetlands, Ts: Seasonal/ intermittent freshwater marshes/ pools on inorganic soils                          | 0 | 20 | 0 | 3 | 81 |
| NA | Water Bodies |  | Marine or coastal wetlands, B: Marine subtidal aquatic beds (Underwater vegetation), K: Coastal freshwater lagoons, J: Coastal brackish / saline lagoons, H: Intertidal marshes, E: Sand, shingle or pebble shores, A: Permanent shallow marine waters, F: Est | 0 | 20 | 0 | B | 80 |
| NA | Water Bodies |  | Marine or coastal wetlands, E: Sand, shingle or pebble shores, F: Estuarine waters, Inland wetlands, M: Permanent rivers/ streams/ creeks, O: Permanent freshwater lakes, P: Seasonal/ intermittent freshwater lakes, Tp: Permanent freshwater marshes/ pools, | 0 | 20 | 0 | E | 80 |



|    |              |  |                                                                                                                                                                                                                                                  |   |    |   |   |    |
|----|--------------|--|--------------------------------------------------------------------------------------------------------------------------------------------------------------------------------------------------------------------------------------------------|---|----|---|---|----|
| NA | Water Bodies |  | Marine or coastal wetlands, H: Intertidal marshes, G: Intertidal mud, sand or salt flats, E: Sand, shingle or pebble shores, F: Estuarine waters, J: Coastal brackish / saline lagoons, Inland wetlands, M: Permanent rivers/ streams/ creeks    | 0 | 20 | 0 | H | 80 |
| NA | Water Bodies |  | Marine or coastal wetlands, J: Coastal brackish / saline lagoons, H: Intertidal marshes, F: Estuarine waters, E: Sand, shingle or pebble shores, G: Intertidal mud, sand or salt flats, Inland wetlands, Tp: Permanent freshwater marshes/ pools | 0 | 20 | 0 | J | 80 |
| NA | Water Bodies |  | Inland wetlands, Q: Permanent saline/ brackish/ alkaline lakes, M: Permanent rivers/ streams/ creeks, Human-made wetlands, 5: Salt exploitation sites                                                                                            | 0 | 20 | 0 | Q | 44 |

|    |              |      |                                                                                                                                                                                                                                                                                       |   |    |   |    |    |
|----|--------------|------|---------------------------------------------------------------------------------------------------------------------------------------------------------------------------------------------------------------------------------------------------------------------------------------|---|----|---|----|----|
| NA | Water Bodies |      | Inland wetlands, Sp:<br>Permanent saline/ brackish/<br>alkaline marshes/ pools,<br>Marine or coastal wetlands, K:<br>Coastal freshwater lagoons, J:<br>Coastal brackish / saline<br>lagoons, Human-made<br>wetlands, 9: Canals and<br>drainage channels or ditches                    | 0 | 20 | 0 | Sp | 52 |
| NA | Water Bodies |      | Inland wetlands, Ss: Seasonal/<br>intermittent saline/ brackish/<br>alkaline marshes/ pools, Q:<br>Permanent saline/ brackish/<br>alkaline lakes, R: Seasonal/<br>intermittent saline/ brackish/<br>alkaline lakes and flats, Sp:<br>Permanent saline/ brackish/<br>alkaline marshes/ | 0 | 20 | 0 | Ss | 52 |
| NA | Water Bodies | Lake |                                                                                                                                                                                                                                                                                       | 0 | 20 | 1 | 0  | 41 |

|    |              |                 |                                                                                                                                                                                                                                                                |   |    |   |   |    |
|----|--------------|-----------------|----------------------------------------------------------------------------------------------------------------------------------------------------------------------------------------------------------------------------------------------------------------|---|----|---|---|----|
| NA | Water Bodies | Lake            | Marine or coastal wetlands, E: Sand, shingle or pebble shores, F: Estuarine waters, Inland wetlands, M: Permanent rivers/ streams/ creeks, O: Permanent freshwater lakes, P: Seasonal/ intermittent freshwater lakes, Tp: Permanent freshwater marshes/ pools, | 0 | 20 | 1 | E | 80 |
| NA | Water Bodies | Lake            | Marine or coastal wetlands, H: Intertidal marshes, J: Coastal brackish / saline lagoons, Human-made wetlands, 9: Canals and drainage channels or ditches                                                                                                       | 0 | 20 | 1 | H | 80 |
| NA | Water Bodies | River           |                                                                                                                                                                                                                                                                | 0 | 20 | 3 | 0 | 46 |
| NA | Water Bodies | River           | Marine or coastal wetlands, E: Sand, shingle or pebble shores, F: Estuarine waters, Inland wetlands, M: Permanent rivers/ streams/ creeks, O: Permanent freshwater lakes, P: Seasonal/ intermittent freshwater lakes, Tp: Permanent freshwater marshes/ pools, | 0 | 20 | 3 | E | 80 |
| NA | Water Bodies | Coastal Wetland |                                                                                                                                                                                                                                                                | 0 | 20 | 5 | 0 | 80 |

|    |              |                 |                                                                                                                                                                                                                                                                |   |    |   |    |    |
|----|--------------|-----------------|----------------------------------------------------------------------------------------------------------------------------------------------------------------------------------------------------------------------------------------------------------------|---|----|---|----|----|
| NA | Water Bodies | Coastal Wetland | Marine or coastal wetlands, B: Marine subtidal aquatic beds (Underwater vegetation), K: Coastal freshwater lagoons, J: Coastal brackish / saline lagoons, H: Intertidal marshes, E: Sand, shingle or pebble shores, A: Permanent shallow marine waters, F: Est | 0 | 20 | 5 | B  | 80 |
| NA | Water Bodies | Coastal Wetland | Marine or coastal wetlands, E: Sand, shingle or pebble shores, F: Estuarine waters, Inland wetlands, M: Permanent rivers/ streams/ creeks, O: Permanent freshwater lakes, P: Seasonal/ intermittent freshwater lakes, Tp: Permanent freshwater marshes/ pools, | 0 | 20 | 5 | E  | 80 |
| NA | Water Bodies | Coastal Wetland | Inland wetlands, Ss: Seasonal/ intermittent saline/ brackish/ alkaline marshes/ pools, Q: Permanent saline/ brackish/ alkaline lakes, R: Seasonal/ intermittent saline/ brackish/ alkaline lakes and flats, Sp: Permanent saline/ brackish/ alkaline marshes/  | 0 | 20 | 5 | Ss | 52 |

|                     |                                          |                 |                                                                                                                                                                                                                                                                |   |    |   |   |    |
|---------------------|------------------------------------------|-----------------|----------------------------------------------------------------------------------------------------------------------------------------------------------------------------------------------------------------------------------------------------------------|---|----|---|---|----|
| NA                  | Snow and Ice                             |                 |                                                                                                                                                                                                                                                                | 0 | 21 | 0 | 0 | 79 |
| NA                  | Artificial surfaces and associated areas |                 |                                                                                                                                                                                                                                                                | 0 | 22 | 0 | 0 | 73 |
| NA                  | Artificial surfaces and associated areas |                 | Marine or coastal wetlands, H: Intertidal marshes, G: Intertidal mud, sand or salt flats, E: Sand, shingle or pebble shores, F: Estuarine waters, J: Coastal brackish / saline lagoons, Inland wetlands, M: Permanent rivers/ streams/ creeks                  | 0 | 22 | 0 | H | 80 |
| NA                  | Artificial surfaces and associated areas | Lake            |                                                                                                                                                                                                                                                                | 0 | 22 | 1 | 0 | 41 |
| NA                  | Artificial surfaces and associated areas | Coastal Wetland |                                                                                                                                                                                                                                                                | 0 | 22 | 5 | 0 | 80 |
| NA                  | Artificial surfaces and associated areas | Coastal Wetland | Marine or coastal wetlands, B: Marine subtidal aquatic beds (Underwater vegetation), K: Coastal freshwater lagoons, J: Coastal brackish / saline lagoons, H: Intertidal marshes, E: Sand, shingle or pebble shores, A: Permanent shallow marine waters, F: Est | 0 | 22 | 5 | B | 80 |
| Extensive Grassland |                                          |                 |                                                                                                                                                                                                                                                                | 1 | 0  | 0 | 0 | 75 |

|                      |                                                          |  |  |    |    |   |   |    |
|----------------------|----------------------------------------------------------|--|--|----|----|---|---|----|
| Intensive Grassland  |                                                          |  |  | 2  | 0  | 0 | 0 | 76 |
| Silage               |                                                          |  |  | 3  | 0  | 0 | 0 | 76 |
| Forage               |                                                          |  |  | 4  | 0  | 0 | 0 | 76 |
| Hop                  |                                                          |  |  | 5  | 0  | 0 | 0 | 74 |
| Legumes              |                                                          |  |  | 6  | 0  | 0 | 0 | 74 |
| Maize                |                                                          |  |  | 7  | 0  | 0 | 0 | 74 |
| Oat                  |                                                          |  |  | 8  | 0  | 0 | 0 | 74 |
| Oleaginous/Rapseed   |                                                          |  |  | 9  | 0  | 0 | 0 | 74 |
| Potatoes             |                                                          |  |  | 10 | 0  | 0 | 0 | 74 |
| Rye                  |                                                          |  |  | 11 | 0  | 0 | 0 | 74 |
| Setaside             |                                                          |  |  | 12 | 0  | 0 | 0 | 74 |
| Sugar Beet           |                                                          |  |  | 13 | 0  | 0 | 0 | 74 |
| Summer Barley        |                                                          |  |  | 14 | 0  | 0 | 0 | 74 |
| Summer Wheat         |                                                          |  |  | 15 | 0  | 0 | 0 | 74 |
| Winter Barley        |                                                          |  |  | 16 | 0  | 0 | 0 | 74 |
| Winter Wheat         |                                                          |  |  | 17 | 0  | 0 | 0 | 74 |
| Industrial built up  |                                                          |  |  | 18 | 0  | 0 | 0 | 73 |
| Residential built up |                                                          |  |  | 19 | 0  | 0 | 0 | 73 |
| Deciduous Forest     | Cultivated and managed areas                             |  |  | 20 | 16 | 0 | 0 | 62 |
| Deciduous Forest     | Mosaic: Cropland / Tree Cover / Other natural vegetation |  |  | 20 | 17 | 0 | 0 | 62 |
| Deciduous Forest     | Water Bodies                                             |  |  | 20 | 20 | 0 | 0 | 62 |

|                  |                                          |  |   |    |    |   |   |    |
|------------------|------------------------------------------|--|---|----|----|---|---|----|
| Deciduous Forest | Artificial surfaces and associated areas |  |   | 20 | 22 | 0 | 0 | 62 |
| Deciduous Forest | Tree Cover broadleaved, deciduous closed |  |   | 20 | 2  | 0 | 0 | 62 |
| Deciduous Forest | Tree Cover, needle leaved, evergreen     |  |   | 20 | 4  | 0 |   | 62 |
| Deciduous Forest | Tree Cover, needle leaved, evergreen     |  | 1 | 20 | 4  | 0 | 1 | 62 |
| Deciduous Forest | Tree Cover, needle leaved, evergreen     |  | 4 | 20 | 4  | 0 | 4 | 81 |
| Deciduous Forest | Tree Cover, needle leaved, evergreen     |  | 6 | 20 | 4  | 0 | 6 | 78 |
| Deciduous Forest | Tree Cover, needle leaved, evergreen     |  | 7 | 20 | 4  | 0 | 7 | 78 |
| Deciduous Forest | Tree Cover, needle leaved, evergreen     |  | 9 | 20 | 4  | 0 | 9 | 78 |
| Deciduous Forest | Tree Cover, needle leaved, evergreen     |  | M | 20 | 4  | 0 | M | 47 |
| Deciduous Forest | Tree Cover, needle leaved, evergreen     |  | O | 20 | 4  | 0 | O | 42 |

|                  |                                      |  |                                                              |    |   |   |       |    |
|------------------|--------------------------------------|--|--------------------------------------------------------------|----|---|---|-------|----|
| Deciduous Forest | Tree Cover, needle leaved, evergreen |  | Tp                                                           | 20 | 4 | 0 | Tp    | 51 |
| Deciduous Forest | Tree Cover, needle leaved, evergreen |  | Ts                                                           | 20 | 4 | 0 | Ts    | 53 |
| Deciduous Forest | Tree Cover, needle leaved, evergreen |  | U                                                            | 20 | 4 | 0 | U     | 55 |
| Deciduous Forest | Tree Cover, needle leaved, evergreen |  | W                                                            | 20 | 4 | 0 | W     | 60 |
| Deciduous Forest | Tree Cover, needle leaved, evergreen |  | Xf                                                           | 20 | 4 | 0 | Xf    | 63 |
| Deciduous Forest | Tree Cover, needle leaved, evergreen |  | Xp                                                           | 20 | 4 | 0 | Xp    | 63 |
| Deciduous Forest | Tree Cover, needle leaved, evergreen |  | Y                                                            | 20 | 4 | 0 | Y     | 48 |
| Deciduous Forest | Tree Cover, needle leaved, evergreen |  | Zk(b)                                                        | 20 | 4 | 0 | Zk(b) | 77 |
| Deciduous Forest | Tree Cover, mixed leaf type          |  |                                                              | 20 | 6 | 0 | 0     | 68 |
| Deciduous Forest | Tree Cover, mixed leaf type          |  | Human-made wetlands, 1: Aquaculture                          | 20 | 6 | 0 | 1     | 78 |
| Deciduous Forest | Tree Cover, mixed leaf type          |  | Human-made wetlands, 4: Seasonally flooded agricultural land | 20 | 6 | 0 | 4     | 81 |
| Deciduous Forest | Tree Cover, mixed leaf type          |  | Human-made wetlands, 6: Water storage areas                  | 20 | 6 | 0 | 6     | 78 |



|                  |                                     |  |                                                                                        |    |    |   |    |    |
|------------------|-------------------------------------|--|----------------------------------------------------------------------------------------|----|----|---|----|----|
| Deciduous Forest | Tree Cover, mixed leaf type         |  | Human-made wetlands, 7: Excavations                                                    | 20 | 6  | 0 | 7  | 78 |
| Deciduous Forest | Tree Cover, mixed leaf type         |  | Inland wetlands, L: Permanent inland deltas                                            | 20 | 6  | 0 | L  | 63 |
| Deciduous Forest | Tree Cover, mixed leaf type         |  | Inland wetlands, M: Permanent rivers/ streams/ creeks                                  | 20 | 6  | 0 | M  | 63 |
| Deciduous Forest | Tree Cover, mixed leaf type         |  | Inland wetlands, O: Permanent freshwater lakes                                         | 20 | 6  | 0 | O  | 42 |
| Deciduous Forest | Tree Cover, mixed leaf type         |  | Inland wetlands, Tp: Permanent freshwater marshes/ pools                               | 20 | 6  | 0 | Tp | 51 |
| Deciduous Forest | Tree Cover, mixed leaf type         |  | Inland wetlands, Ts: Seasonal/intermittent freshwater marshes/pools on inorganic soils | 20 | 6  | 0 | Ts | 53 |
| Deciduous Forest | Tree Cover, mixed leaf type         |  | Inland wetlands, U: Non-forested peatlands                                             | 20 | 6  | 0 | U  | 63 |
| Deciduous Forest | Tree Cover, mixed leaf type         |  | Inland wetlands, W: Shrub-dominated wetlands                                           | 20 | 6  | 0 | W  | 63 |
| Deciduous Forest | Tree Cover, mixed leaf type         |  | Inland wetlands, Xf: Freshwater, tree-dominated wetlands                               | 20 | 6  | 0 | Xf | 63 |
| Deciduous Forest | Tree Cover, mixed leaf type         |  | Inland wetlands, Xp: Forested peatlands                                                | 20 | 6  | 0 | Xp | 63 |
| Deciduous Forest | Tree Cover, mixed leaf type         |  | Inland wetlands, Y: Freshwater springs; oases                                          | 20 | 6  | 0 | Y  | 48 |
| Deciduous Forest | Shrub Cover, closed-open, deciduous |  |                                                                                        | 20 | 12 | 0 | 0  | 59 |

|                  |                                                       |       |    |    |    |   |    |    |
|------------------|-------------------------------------------------------|-------|----|----|----|---|----|----|
| Deciduous Forest | Shrub Cover,<br>closed-open,<br>deciduous             |       |    | 20 | 12 | 0 | 6  | 59 |
| Deciduous Forest | Shrub Cover,<br>closed-open,<br>deciduous             | Lake  |    | 20 | 12 | 1 | 0  | 41 |
| Deciduous Forest | Herbaceous Cover,<br>closed-open                      |       |    | 20 | 13 | 0 | 0  | 62 |
| Deciduous Forest | Herbaceous Cover,<br>closed-open                      |       | 1  | 20 | 13 | 0 | 1  | 62 |
| Deciduous Forest | Herbaceous Cover,<br>closed-open                      |       | Ts | 20 | 13 | 0 | Ts | 53 |
| Deciduous Forest | Herbaceous Cover,<br>closed-open                      | Lake  |    | 20 | 13 | 1 | 0  | 41 |
| Deciduous Forest | Herbaceous Cover,<br>closed-open                      | River |    | 20 | 13 | 3 | 0  | 46 |
| Deciduous Forest | Sparse herbaceous<br>or sparse shrub<br>cover         |       |    | 20 | 14 | 0 | 0  | 62 |
| Deciduous Forest | Regularly flooded<br>shrub and/or<br>herbaceous cover |       |    | 20 | 15 | 0 | 0  | 60 |

|                  |                                                 |                 |   |    |    |   |   |    |
|------------------|-------------------------------------------------|-----------------|---|----|----|---|---|----|
| Deciduous Forest | Regularly flooded shrub and/or herbaceous cover | Lake            |   | 20 | 15 | 1 | 0 | 41 |
| Deciduous Forest | Regularly flooded shrub and/or herbaceous cover | River           |   | 20 | 15 | 3 | 0 | 46 |
| Deciduous Forest | Regularly flooded shrub and/or herbaceous cover | River           | E | 20 | 15 | 3 | E | 80 |
| Deciduous Forest | Regularly flooded shrub and/or herbaceous cover | Coastal Wetland |   | 20 | 15 | 5 | 0 | 80 |
| Deciduous Forest | Regularly flooded shrub and/or herbaceous cover | Coastal Wetland | 1 | 20 | 15 | 5 | 1 | 78 |
| Deciduous Forest | Regularly flooded shrub and/or herbaceous cover | Coastal Wetland | E | 20 | 15 | 5 | E | 80 |

|                  |                                             |           |                                                                                                                                                                                                                                                                |    |    |   |   |    |
|------------------|---------------------------------------------|-----------|----------------------------------------------------------------------------------------------------------------------------------------------------------------------------------------------------------------------------------------------------------------|----|----|---|---|----|
| Deciduous Forest | Mosaic: Cropland / Shrub and/or grass cover |           |                                                                                                                                                                                                                                                                | 20 | 18 | 0 | 0 | 62 |
| Deciduous Forest | Mosaic: Cropland / Shrub and/or grass cover | Reservoir |                                                                                                                                                                                                                                                                | 20 | 18 | 2 | 0 | 78 |
| Conifer Forest   | Tree Cover, broadleaved, deciduous, closed  |           | Human-made wetlands, 6: Water storage areas/Reservoirs, 9: Canals and drainage channels or ditches, 1: Aquaculture ponds, 4: Seasonally flooded agricultural land, Inland wetlands, M: Permanent rivers/ streams/ creeks, Tp: Permanent freshwater marshes/ po | 21 | 2  | 0 | 6 | 78 |
| Conifer Forest   | Shrub Cover, closed-open, deciduous         | Lake      |                                                                                                                                                                                                                                                                | 21 | 12 | 1 | 0 | 41 |
| Conifer Forest   | Herbaceous Cover, closed-open               | Lake      |                                                                                                                                                                                                                                                                | 21 | 13 | 1 | 0 | 71 |
| Conifer Forest   | Sparse herbaceous or sparse shrub cover     |           |                                                                                                                                                                                                                                                                | 21 | 14 | 0 | 0 | 71 |

|                |                                          |       |                                                                                                                                                                                                                                                                |    |    |   |    |    |
|----------------|------------------------------------------|-------|----------------------------------------------------------------------------------------------------------------------------------------------------------------------------------------------------------------------------------------------------------------|----|----|---|----|----|
| Conifer Forest | Cultivated and managed areas             |       | Human-made wetlands, 6: Water storage areas/Reservoirs, 4: Seasonally flooded agricultural land, 7: Excavations, 9: Canals and drainage channels or ditches, 2: Ponds, Inland wetlands, Ts: Seasonal/ intermittent freshwater marshes/ pools on inorganic soil | 21 | 16 | 0 | 6  | 78 |
| Conifer Forest | Cultivated and managed areas             |       | Human-made wetlands, 7: Excavations, 6: Water storage areas/Reservoirs, 4: Seasonally flooded agricultural land, 1: Aquaculture ponds, 9: Canals and drainage channels or ditches, Inland wetlands, Xf: Freshwater, tree-dominated wetlands, W: Shrub-dominate | 21 | 16 | 0 | 7  | 78 |
| Conifer Forest | Cultivated and managed areas             | Lake  |                                                                                                                                                                                                                                                                | 21 | 16 | 1 | 0  | 41 |
| Conifer Forest | Cultivated and managed areas             | River |                                                                                                                                                                                                                                                                | 21 | 16 | 3 | 0  | 46 |
| Conifer Forest | Artificial surfaces and associated areas | Lake  |                                                                                                                                                                                                                                                                | 21 | 22 | 1 | 0  | 41 |
| Conifer Forest |                                          |       | Inland wetlands, Xf: Freshwater, tree-dominated wetlands                                                                                                                                                                                                       | 21 | 0  | 0 | Xf | 63 |

|                |                                            |  |                                                                                                                                                                                                                                                                |    |   |   |    |    |
|----------------|--------------------------------------------|--|----------------------------------------------------------------------------------------------------------------------------------------------------------------------------------------------------------------------------------------------------------------|----|---|---|----|----|
| Conifer Forest |                                            |  | Inland wetlands, Xp: Forested peatlands                                                                                                                                                                                                                        | 21 | 0 | 0 | Xp | 63 |
| Conifer Forest | Tree Cover, broadleaved, deciduous, closed |  |                                                                                                                                                                                                                                                                | 21 | 2 | 0 | 0  | 66 |
| Conifer Forest | Tree Cover, broadleaved, deciduous, closed |  | Human-made wetlands, 1: Aquaculture ponds, Inland wetlands, Xf: Freshwater, tree-dominated wetlands, U: Permanent Non-forested peatlands, W: Shrub-dominated wetlands                                                                                          | 21 | 2 | 0 | 1  | 63 |
| Conifer Forest | Tree Cover, broadleaved, deciduous, closed |  | Human-made wetlands, 4: Seasonally flooded agricultural land, 6: Water storage areas/Reservoirs, Inland wetlands, M: Permanent rivers/ streams/ creeks, Tp: Permanent freshwater marshes/ pools, Ts: Seasonal/ intermittent freshwater marshes/ pools on inorg | 21 | 2 | 0 | 4  | 81 |

|                |                                                  |  |                                                                                                                                                                                                                                                                                           |    |   |   |   |    |
|----------------|--------------------------------------------------|--|-------------------------------------------------------------------------------------------------------------------------------------------------------------------------------------------------------------------------------------------------------------------------------------------|----|---|---|---|----|
| Conifer Forest | Tree Cover,<br>broadleaved,<br>deciduous, closed |  | Human-made wetlands, 9:<br>Canals and drainage channels<br>or ditches, 4: Seasonally<br>flooded agricultural land, 2:<br>Ponds, Inland wetlands, U:<br>Permanent Non-forested<br>peatlands, Tp: Permanent<br>freshwater marshes/ pools, Xp:<br>Permanent Forested peatlands               | 21 | 2 | 0 | 9 | 81 |
| Conifer Forest | Tree Cover,<br>broadleaved,<br>deciduous, closed |  | Marine or coastal wetlands, H:<br>Intertidal marshes, G: Intertidal<br>mud, sand or salt flats, E: Sand,<br>shingle or pebble shores, F:<br>Estuarine waters, J: Coastal<br>brackish / saline lagoons,<br>Inland wetlands, M: Permanent<br>rivers/ streams/ creeks                        | 21 | 2 | 0 | H | 80 |
| Conifer Forest | Tree Cover,<br>broadleaved,<br>deciduous, closed |  | Inland wetlands, M: Permanent<br>rivers/ streams/ creeks, N:<br>Seasonal/ intermittent/<br>irregular rivers/ streams/<br>creeks, O: Permanent<br>freshwater lakes, Tp:<br>Permanent freshwater<br>marshes/ pools, Ts: Seasonal/<br>intermittent freshwater<br>marshes/ pools on inorganic | 21 | 2 | 0 | M | 63 |

|                |                                                  |  |                                                                                                                                                                                                                                                                                            |    |   |   |    |    |
|----------------|--------------------------------------------------|--|--------------------------------------------------------------------------------------------------------------------------------------------------------------------------------------------------------------------------------------------------------------------------------------------|----|---|---|----|----|
| Conifer Forest | Tree Cover,<br>broadleaved,<br>deciduous, closed |  | Inland wetlands, M: Permanent<br>rivers/ streams/ creeks, O:<br>Permanent freshwater lakes,<br>Tp: Permanent freshwater<br>marshes/ pools, W: Shrub-<br>dominated wetlands, Xf:<br>Freshwater, tree dominated<br>wetlands, L: Permanent inland<br>deltas, Human-made wetlands,<br>9: Canal | 21 | 2 | 0 | M  | 63 |
| Conifer Forest | Tree Cover,<br>broadleaved,<br>deciduous, closed |  | Inland wetlands, N:<br>Seasonal/intermittent/irregula<br>r rivers/ streams creeks                                                                                                                                                                                                          | 21 | 2 | 0 | N  | 63 |
| Conifer Forest | Tree Cover,<br>broadleaved,<br>deciduous, closed |  | Inland wetlands, O: Permanent<br>freshwater lakes, Tp:<br>Permanent freshwater<br>marshes/ pools                                                                                                                                                                                           | 21 | 2 | 0 | O  | 42 |
| Conifer Forest | Tree Cover,<br>broadleaved,<br>deciduous, closed |  | Inland wetlands, Ts: Seasonal/<br>intermittent freshwater<br>marshes/ pools on inorganic<br>soils, M: Permanent rivers/<br>streams/ creeks, W: Shrub-<br>dominated wetlands, Xf:<br>Freshwater, tree-dominated<br>wetlands, P: Seasonal/<br>intermittent freshwater lakes,<br>Zk(b): Karst | 21 | 2 | 0 | Ts | 63 |



|                |                                                  |                                     |                                                                                                                                                                                                                                                                                            |    |   |   |    |    |
|----------------|--------------------------------------------------|-------------------------------------|--------------------------------------------------------------------------------------------------------------------------------------------------------------------------------------------------------------------------------------------------------------------------------------------|----|---|---|----|----|
| Conifer Forest | Tree Cover,<br>broadleaved,<br>deciduous, closed |                                     | Inland wetlands, Ts: Seasonal/<br>intermittent freshwater<br>marshes/ pools on inorganic<br>soils, M: Permanent rivers/<br>streams/ creeks, Xf:<br>Freshwater, tree-dominated<br>wetlands, Human-made<br>wetlands, 1: Aquaculture<br>ponds                                                 | 21 | 2 | 0 | Ts | 63 |
| Conifer Forest | Tree Cover,<br>broadleaved,<br>deciduous, closed |                                     | Inland wetlands, Xp: Forested<br>peatlands                                                                                                                                                                                                                                                 | 21 | 2 | 0 | Xp | 63 |
| Conifer Forest | Tree Cover,<br>broadleaved,<br>deciduous, closed |                                     | Inland wetlands, Y: Permanent<br>Freshwater springs; oases, M:<br>Permanent rivers/ streams/<br>creeks, Tp: Permanent<br>freshwater marshes/ pools, Xp:<br>Permanent Forested peatlands,<br>Xf: Freshwater, tree-<br>dominated wetlands, U:<br>Permanent Non-forested<br>peatlands, W: Shr | 21 | 2 | 0 | Y  | 63 |
| Conifer Forest | Tree Cover,<br>broadleaved,<br>deciduous, closed | Lake                                |                                                                                                                                                                                                                                                                                            | 21 | 2 | 1 | 0  | 66 |
| Conifer Forest | Tree Cover,<br>broadleaved,<br>deciduous, closed | Freshwater<br>Marsch,<br>Floodplain |                                                                                                                                                                                                                                                                                            | 21 | 2 | 4 | 0  | 51 |

|                |                                               |                 |  |               |              |              |              |               |
|----------------|-----------------------------------------------|-----------------|--|---------------|--------------|--------------|--------------|---------------|
| Conifer Forest | Tree Cover, broadleaved, deciduous, closed    | Coastal Wetland |  | 21            | 2            | 5            | 0            | 80            |
| Conifer Forest | Tree Cover, needle leaved, evergreen          |                 |  | 21            | 4            | 0            | 0            | 66            |
| Conifer Forest | Tree Cover, needle leaved, deciduous          |                 |  | 21            | 5            | 0            | 0            | 66            |
| Conifer Forest | Tree Cover, mixed leaf type                   |                 |  | 21            | 6            | 0            | 0            | 68            |
| Conifer Forest | Tree Cover regularly flooded, freshwater      |                 |  | 21            | 7            | 0            | 0            | 63            |
| Conifer Forest | Tree Cover regularly flooded, freshwater      |                 |  | <del>21</del> | <del>7</del> | <del>0</del> | <del>0</del> | <del>67</del> |
| Conifer Forest | Tree Cover regularly flooded, saline water    |                 |  | 21            | 8            | 0            | 0            | 64            |
| Conifer Forest | Mosaic: Tree Cover / Other natural vegetation |                 |  | 21            | 9            | 0            | 0            | 71            |
| Conifer Forest | Tree Cover, burnt                             |                 |  | 21            | 10           | 0            | 0            | 70            |
| Conifer Forest | Shrub Cover, closed-open, evergreen           |                 |  | 21            | 11           | 0            | 0            | 59            |

|                |                                           |  |                                                                                                                                                                                                                                                                                              |    |    |   |   |    |
|----------------|-------------------------------------------|--|----------------------------------------------------------------------------------------------------------------------------------------------------------------------------------------------------------------------------------------------------------------------------------------------|----|----|---|---|----|
| Conifer Forest | Shrub Cover,<br>closed-open,<br>deciduous |  |                                                                                                                                                                                                                                                                                              | 21 | 12 | 0 | 0 | 59 |
| Conifer Forest | Herbaceous Cover,<br>closed-open          |  |                                                                                                                                                                                                                                                                                              | 21 | 13 | 0 | 0 | 66 |
| Conifer Forest | Herbaceous Cover,<br>closed-open          |  | Human-made wetlands, 3:<br>Irrigated land, Marine or<br>coastal wetlands, E: Sand,<br>shingle or pebble shores, J:<br>Coastal brackish / saline<br>lagoons, Inland wetlands, Ts:<br>Seasonal/ intermittent<br>freshwater marshes/ pools on<br>inorganic soils                                | 21 | 13 | 0 | 3 | 81 |
| Conifer Forest | Herbaceous Cover,<br>closed-open          |  | Inland wetlands, Y: Permanent<br>Freshwater springs; oases,<br>Zk(b): Karst and other<br>subterranean hydrological<br>systems, Va: Montane<br>wetlands, M: Permanent<br>rivers/ streams/ creeks, U:<br>Permanent Non-forested<br>peatlands, Human-made<br>wetlands, 4: Seasonally<br>flooded | 21 | 13 | 0 | Y | 55 |

|                |                                         |                           |                                                                                                                                                                                                                                                                |    |    |   |   |    |
|----------------|-----------------------------------------|---------------------------|----------------------------------------------------------------------------------------------------------------------------------------------------------------------------------------------------------------------------------------------------------------|----|----|---|---|----|
| Conifer Forest | Herbaceous Cover, closed-open           | Lake                      | Human-made wetlands, 3: Irrigated land, Marine or coastal wetlands, E: Sand, shingle or pebble shores, J: Coastal brackish / saline lagoons, Inland wetlands, Ts: Seasonal/ intermittent freshwater marshes/ pools on inorganic soils                          | 21 | 13 | 1 | 3 | 81 |
| Conifer Forest | Herbaceous Cover, closed-open           | Coastal Wetland           |                                                                                                                                                                                                                                                                | 21 | 13 | 5 | 0 | 80 |
| Conifer Forest | Sparse herbaceous or sparse shrub cover |                           | Inland wetlands, Y: Permanent Freshwater springs; oases, Zk(b): Karst and other subterranean hydrological systems, Va: Montane wetlands, M: Permanent rivers/ streams/ creeks, U: Permanent Non-forested peatlands, Human-made wetlands, 4: Seasonally flooded | 21 | 14 | 0 | Y | 55 |
| Conifer Forest | Sparse herbaceous or sparse shrub cover | Lake                      |                                                                                                                                                                                                                                                                | 21 | 14 | 1 | 0 | 41 |
| Conifer Forest | Sparse herbaceous or sparse shrub cover | Bog, Fen, Mire (Peatland) |                                                                                                                                                                                                                                                                | 21 | 14 | 7 | 0 | 52 |

|                |                                                 |                 |                                                                                                                                                                                                                                                                |    |    |   |     |    |
|----------------|-------------------------------------------------|-----------------|----------------------------------------------------------------------------------------------------------------------------------------------------------------------------------------------------------------------------------------------------------------|----|----|---|-----|----|
| Conifer Forest | Regularly flooded shrub and/or herbaceous cover |                 |                                                                                                                                                                                                                                                                | 21 | 15 | 0 | 0   | 60 |
| Conifer Forest | Regularly flooded shrub and/or herbaceous cover | Lake            |                                                                                                                                                                                                                                                                | 21 | 15 | 1 | 0   | 60 |
| Conifer Forest | Regularly flooded shrub and/or herbaceous cover | Reservoir       |                                                                                                                                                                                                                                                                | 21 | 15 | 2 | 0   | 60 |
| Conifer Forest | Regularly flooded shrub and/or herbaceous cover | Coastal Wetland |                                                                                                                                                                                                                                                                | 21 | 15 | 5 | 0   | 80 |
| Conifer Forest | Regularly flooded shrub and/or herbaceous cover | Coastal Wetland | Marine or coastal wetlands, E: Sand, shingle or pebble shores, F: Estuarine waters, Inland wetlands, M: Permanent rivers/ streams/ creeks, O: Permanent freshwater lakes, P: Seasonal/ intermittent freshwater lakes, Tp: Permanent freshwater marshes/ pools, | 21 | 15 | 5 | E/9 | 80 |

|                |                                                 |                 |                                                                                                                                                                                                                                                                |    |    |   |    |    |
|----------------|-------------------------------------------------|-----------------|----------------------------------------------------------------------------------------------------------------------------------------------------------------------------------------------------------------------------------------------------------------|----|----|---|----|----|
| Conifer Forest | Regularly flooded shrub and/or herbaceous cover | Coastal Wetland | Inland wetlands, Ss: Seasonal/ intermittent saline/ brackish/ alkaline marshes/ pools, Q: Permanent saline/ brackish/ alkaline lakes, R: Seasonal/ intermittent saline/ brackish/ alkaline lakes and flats, Sp: Permanent saline/ brackish/ alkaline marshes/  | 21 | 15 | 5 | Ss | 45 |
| Conifer Forest | Cultivated and managed areas                    |                 |                                                                                                                                                                                                                                                                | 21 | 16 | 0 | 0  | 66 |
| Conifer Forest | Cultivated and managed areas                    |                 | Human-made wetlands, 4: Seasonally flooded agricultural land, 6: Water storage areas/Reservoirs, Inland wetlands, M: Permanent rivers/ streams/ creeks, Tp: Permanent freshwater marshes/ pools, Ts: Seasonal/ intermittent freshwater marshes/ pools on inorg | 21 | 16 | 0 | 4  | 81 |

|                |                              |  |                                                                                                                                                                                                                                                                |    |    |   |    |    |
|----------------|------------------------------|--|----------------------------------------------------------------------------------------------------------------------------------------------------------------------------------------------------------------------------------------------------------------|----|----|---|----|----|
| Conifer Forest | Cultivated and managed areas |  | Marine or coastal wetlands, G: Intertidal mud, sand or salt flats, K: Coastal freshwater lagoons, H: Intertidal marshes, B: Marine subtidal aquatic beds (Underwater vegetation), J: Coastal brackish / saline lagoons, Human-made wetlands, 9: Canals and dra | 21 | 16 | 0 | G  | 80 |
| Conifer Forest | Cultivated and managed areas |  | Inland wetlands, M: Permanent rivers/ streams/creeks                                                                                                                                                                                                           | 21 | 16 | 0 | M  | 63 |
| Conifer Forest | Cultivated and managed areas |  | Inland wetlands, Tp: Permanent freshwater marshes/ pools, O: Permanent freshwater lakes                                                                                                                                                                        | 21 | 16 | 0 | Tp | 51 |
| Conifer Forest | Cultivated and managed areas |  | Inland wetlands, Ts: Seasonal/ intermittent freshwater marshes/ pools on inorganic soils, M: Permanent rivers/ streams/ creeks, W: Shrub-dominated wetlands, Xf: Freshwater, tree-dominated wetlands, P: Seasonal/ intermittent freshwater lakes, Zk(b): Karst | 21 | 16 | 0 | Ts | 53 |

|                |                              |      |                                                                                                                                                                                                                                                                |    |    |   |    |    |
|----------------|------------------------------|------|----------------------------------------------------------------------------------------------------------------------------------------------------------------------------------------------------------------------------------------------------------------|----|----|---|----|----|
| Conifer Forest | Cultivated and managed areas |      | Inland wetlands, U: Permanent Non-forested peatlands, Ts: Seasonal/ intermittent freshwater marshes/ pools on inorganic soils, Xp: Permanent Forested peatlands, Tp: Permanent freshwater marshes/ pools, Human-made wetlands, 9: Canals and drainage channels | 21 | 16 | 0 | U  | 55 |
| Conifer Forest | Cultivated and managed areas |      | Inland wetlands, Xf: Freshwater, tree-dominated wetlands                                                                                                                                                                                                       | 21 | 16 | 0 | Xf | 63 |
| Conifer Forest | Cultivated and managed areas |      | Inland wetlands, Y: Permanent Freshwater springs; oases, M: Permanent rivers/ streams/ creeks, Tp: Permanent freshwater marshes/ pools, Xp: Permanent Forested peatlands, Xf: Freshwater, tree-dominated wetlands, U: Permanent Non-forested peatlands, W: Shr | 21 | 16 | 0 | Y  | 63 |
| Conifer Forest | Cultivated and managed areas | Lake | Inland wetlands, Tp: Permanent freshwater marshes/ pools, O: Permanent freshwater lakes                                                                                                                                                                        | 21 | 16 | 1 | Tp | 51 |



|                |                                                          |                               |                                                                                                                                                                                                                                                                |    |    |   |   |    |
|----------------|----------------------------------------------------------|-------------------------------|----------------------------------------------------------------------------------------------------------------------------------------------------------------------------------------------------------------------------------------------------------------|----|----|---|---|----|
| Conifer Forest | Cultivated and managed areas                             | Freshwater Marsch, Floodplain |                                                                                                                                                                                                                                                                | 21 | 16 | 4 | 0 | 51 |
| Conifer Forest | Cultivated and managed areas                             | Coastal Wetland               |                                                                                                                                                                                                                                                                | 21 | 16 | 5 | 0 | 80 |
| Conifer Forest | Cultivated and managed areas                             | Coastal Wetland               | Marine or coastal wetlands, E: Sand, shingle or pebble shores, F: Estuarine waters, Inland wetlands, M: Permanent rivers/ streams/ creeks, O: Permanent freshwater lakes, P: Seasonal/ intermittent freshwater lakes, Tp: Permanent freshwater marshes/ pools, | 21 | 16 | 5 | E | 80 |
| Conifer Forest | Mosaic: Cropland / Tree Cover / Other natural vegetation |                               |                                                                                                                                                                                                                                                                | 21 | 17 | 0 | 0 | 66 |
| Conifer Forest | Mosaic: Cropland / Shrub and/or grass cover              |                               |                                                                                                                                                                                                                                                                | 21 | 18 | 0 | 0 | 66 |
| Conifer Forest | Bare Areas                                               |                               |                                                                                                                                                                                                                                                                | 21 | 19 | 0 | 0 | 66 |

|                |              |  |                                                                                                                                                                                                                                                                |    |    |   |   |    |
|----------------|--------------|--|----------------------------------------------------------------------------------------------------------------------------------------------------------------------------------------------------------------------------------------------------------------|----|----|---|---|----|
| Conifer Forest | Bare Areas   |  | Marine or coastal wetlands, A: Permanent shallow marine waters, E: Sand, shingle or pebble shores, F: Estuarine waters, G: Intertidal mud, sand or salt flats, H: Intertidal marshes, J: Coastal brackish / saline lagoons, Inland wetlands, M: Permanent rive | 21 | 19 | 0 | A | 80 |
| Conifer Forest | Water Bodies |  |                                                                                                                                                                                                                                                                | 21 | 20 | 0 | 0 | 66 |
| Conifer Forest | Water Bodies |  | Human-made wetlands, 3: Irrigated land, Marine or coastal wetlands, E: Sand, shingle or pebble shores, J: Coastal brackish / saline lagoons, Inland wetlands, Ts: Seasonal/ intermittent freshwater marshes/ pools on inorganic soils                          | 21 | 20 | 0 | 3 | 81 |
| Conifer Forest | Water Bodies |  | Human-made wetlands, 4: Seasonally flooded agricultural land, 6: Water storage areas/Reservoirs, Inland wetlands, M: Permanent rivers/ streams/ creeks, Tp: Permanent freshwater marshes/ pools, Ts: Seasonal/ intermittent freshwater marshes/ pools on inorg | 21 | 20 | 0 | 4 | 81 |

|                |              |  |                                                                                                                                                                                                                                                                |    |    |   |   |    |
|----------------|--------------|--|----------------------------------------------------------------------------------------------------------------------------------------------------------------------------------------------------------------------------------------------------------------|----|----|---|---|----|
| Conifer Forest | Water Bodies |  | Human-made wetlands, 5: Salt exploitation sites, Marine or coastal wetlands, A: Permanent shallow marine waters, G: Intertidal mud, sand or salt flats, J: Coastal brackish / saline lagoons                                                                   | 21 | 20 | 0 | 5 | 64 |
| Conifer Forest | Water Bodies |  | Marine or coastal wetlands, A: Permanent shallow marine waters, E: Sand, shingle or pebble shores, F: Estuarine waters, G: Intertidal mud, sand or salt flats, H: Intertidal marshes, J: Coastal brackish / saline lagoons, Inland wetlands, M: Permanent rive | 21 | 20 | 0 | A | 80 |
| Conifer Forest | Water Bodies |  | Marine or coastal wetlands, G: Intertidal mud, sand or salt flats, J: Coastal brackish / saline lagoons, B: Marine subtidal aquatic beds (Underwater vegetation), H: Intertidal marshes, Human-made wetlands, 9: Canals and drainage channels or ditches       | 21 | 20 | 0 | G | 80 |

|                |              |  |                                                                                                                                                                                                                                                                |    |    |   |    |    |
|----------------|--------------|--|----------------------------------------------------------------------------------------------------------------------------------------------------------------------------------------------------------------------------------------------------------------|----|----|---|----|----|
| Conifer Forest | Water Bodies |  | Inland wetlands, N: Seasonal/ intermittent/ irregular rivers/ streams/ creeks, M: Permanent rivers/ streams/ creeks, Human-made wetlands, 9: Canals and drainage channels or ditches, 4: Seasonally flooded agricultural land, 7: Excavations, Marine or coast | 21 | 20 | 0 | N  | 49 |
| Conifer Forest | Water Bodies |  | Inland wetlands, O: Permanent freshwater lakes, Tp: Permanent freshwater marshes/ pools                                                                                                                                                                        | 21 | 20 | 0 | O  | 42 |
| Conifer Forest | Water Bodies |  | Inland wetlands, Sp: Permanent saline/ brackish/ alkaline marshes/ pools, Marine or coastal wetlands, K: Coastal freshwater lagoons, J: Coastal brackish / saline lagoons, Human-made wetlands, 9: Canals and drainage channels or ditches                     | 21 | 20 | 0 | Sp | 52 |

|                |              |      |                                                                                                                                                                                                                                                                |    |    |   |    |    |
|----------------|--------------|------|----------------------------------------------------------------------------------------------------------------------------------------------------------------------------------------------------------------------------------------------------------------|----|----|---|----|----|
| Conifer Forest | Water Bodies |      | Inland wetlands, Ss: Seasonal/ intermittent saline/ brackish/ alkaline marshes/ pools, Q: Permanent saline/ brackish/ alkaline lakes, R: Seasonal/ intermittent saline/ brackish/ alkaline lakes and flats, Sp: Permanent saline/ brackish/ alkaline marshes/  | 21 | 20 | 0 | Ss | 45 |
| Conifer Forest | Water Bodies |      | Inland wetlands, Y: Permanent Freshwater springs; oases, N: Seasonal/ intermittent/ irregular rivers/ streams/ creeks, Ts: Seasonal/ intermittent freshwater marshes/ pools on inorganic soils, Q: Permanent saline/ brackish/ alkaline lakes, Sp: Permanent s | 21 | 20 | 0 | Y  | 51 |
| Conifer Forest | Water Bodies | Lake |                                                                                                                                                                                                                                                                | 21 | 20 | 1 | 0  | 41 |
| Conifer Forest | Water Bodies | Lake | Human-made wetlands, 3: Irrigated land, Marine or coastal wetlands, E: Sand, shingle or pebble shores, J: Coastal brackish / saline lagoons, Inland wetlands, Ts: Seasonal/ intermittent freshwater marshes/ pools on inorganic soils                          | 21 | 20 | 1 | 3  | 81 |

|                |              |      |                                                                                                                                                                                                                                                                |    |    |   |    |    |
|----------------|--------------|------|----------------------------------------------------------------------------------------------------------------------------------------------------------------------------------------------------------------------------------------------------------------|----|----|---|----|----|
| Conifer Forest | Water Bodies | Lake | Human-made wetlands, 4: Seasonally flooded agricultural land, 6: Water storage areas/Reservoirs, Inland wetlands, M: Permanent rivers/ streams/ creeks, Tp: Permanent freshwater marshes/ pools, Ts: Seasonal/ intermittent freshwater marshes/ pools on inorg | 21 | 20 | 1 | 4  | 81 |
| Conifer Forest | Water Bodies | Lake | Inland wetlands, O: Permanent freshwater lakes, Tp: Permanent freshwater marshes/ pools                                                                                                                                                                        | 21 | 20 | 1 | O  | 42 |
| Conifer Forest | Water Bodies | Lake | Inland wetlands, Tp: Permanent freshwater marshes/ pools, O: Permanent freshwater lakes                                                                                                                                                                        | 21 | 20 | 1 | Tp | 51 |
| Conifer Forest | Water Bodies | Lake | Inland wetlands, U: Permanent Non-forested peatlands, M: Permanent rivers/ streams/ creeks, O: Permanent freshwater lakes, Tp: Permanent freshwater marshes/ pools                                                                                             | 21 | 20 | 1 | U  | 55 |

|                |              |                               |                                                                                                                                                                                                                                                                |    |    |   |   |    |
|----------------|--------------|-------------------------------|----------------------------------------------------------------------------------------------------------------------------------------------------------------------------------------------------------------------------------------------------------------|----|----|---|---|----|
| Conifer Forest | Water Bodies | Lake                          | Inland wetlands, Y: Permanent Freshwater springs; oases, N: Seasonal/ intermittent/ irregular rivers/ streams/ creeks, Ts: Seasonal/ intermittent freshwater marshes/ pools on inorganic soils, Q: Permanent saline/ brackish/ alkaline lakes, Sp: Permanent s | 21 | 20 | 1 | Y | 42 |
| Conifer Forest | Water Bodies | River                         |                                                                                                                                                                                                                                                                | 21 | 20 | 3 | 0 | 46 |
| Conifer Forest | Water Bodies | Freshwater Marsch, Floodplain |                                                                                                                                                                                                                                                                | 21 | 20 | 4 | 0 | 51 |
| Conifer Forest | Water Bodies | Coastal Wetland               |                                                                                                                                                                                                                                                                | 21 | 20 | 5 | 0 | 80 |
| Conifer Forest | Water Bodies | Coastal Wetland               | Marine or coastal wetlands, E: Sand, shingle or pebble shores, F: Estuarine waters, Inland wetlands, M: Permanent rivers/ streams/ creeks, O: Permanent freshwater lakes, P: Seasonal/ intermittent freshwater lakes, Tp: Permanent freshwater marshes/ pools, | 21 | 20 | 5 | E | 80 |

|                |                                          |                           |                                                                                                                                                                                                                                                               |    |    |   |    |    |
|----------------|------------------------------------------|---------------------------|---------------------------------------------------------------------------------------------------------------------------------------------------------------------------------------------------------------------------------------------------------------|----|----|---|----|----|
| Conifer Forest | Water Bodies                             | Coastal Wetland           | Inland wetlands, Ss: Seasonal/ intermittent saline/ brackish/ alkaline marshes/ pools, Q: Permanent saline/ brackish/ alkaline lakes, R: Seasonal/ intermittent saline/ brackish/ alkaline lakes and flats, Sp: Permanent saline/ brackish/ alkaline marshes/ | 21 | 20 | 5 | Ss | 45 |
| Conifer Forest | Water Bodies                             | Bog, Fen, Mire (Peatland) |                                                                                                                                                                                                                                                               | 21 | 20 | 8 | 0  | 52 |
| Conifer Forest | Snow and Ice                             |                           |                                                                                                                                                                                                                                                               | 21 | 21 | 0 | 0  | 66 |
| Conifer Forest | Artificial surfaces and associated areas |                           |                                                                                                                                                                                                                                                               | 21 | 22 | 0 | 0  | 66 |
| Conifer Forest | Artificial surfaces and associated areas |                           | Human-made wetlands, 3: Irrigated land, Marine or coastal wetlands, E: Sand, shingle or pebble shores, J: Coastal brackish / saline lagoons, Inland wetlands, Ts: Seasonal/ intermittent freshwater marshes/ pools on inorganic soils                         | 21 | 22 | 0 | 3  | 81 |



|                |                                          |      |                                                                                                                                                                                                                                                          |    |    |   |   |    |
|----------------|------------------------------------------|------|----------------------------------------------------------------------------------------------------------------------------------------------------------------------------------------------------------------------------------------------------------|----|----|---|---|----|
| Conifer Forest | Artificial surfaces and associated areas |      | Marine or coastal wetlands, G: Intertidal mud, sand or salt flats, J: Coastal brackish / saline lagoons, B: Marine subtidal aquatic beds (Underwater vegetation), H: Intertidal marshes, Human-made wetlands, 9: Canals and drainage channels or ditches | 21 | 22 | 0 | G | 80 |
| Conifer Forest | Artificial surfaces and associated areas |      | Marine or coastal wetlands, H: Intertidal marshes, G: Intertidal mud, sand or salt flats, E: Sand, shingle or pebble shores, F: Estuarine waters, J: Coastal brackish / saline lagoons, Inland wetlands, M: Permanent rivers/ streams/ creeks            | 21 | 22 | 0 | H | 80 |
| Conifer Forest | Artificial surfaces and associated areas | Lake | Human-made wetlands, 3: Irrigated land, Marine or coastal wetlands, E: Sand, shingle or pebble shores, J: Coastal brackish / saline lagoons, Inland wetlands, Ts: Seasonal/ intermittent freshwater marshes/ pools on inorganic soils                    | 21 | 22 | 1 | 3 | 81 |
| Wetland        | Tree Cover, mixed leaf type              |      |                                                                                                                                                                                                                                                          | 23 | 6  | 0 | 0 | 63 |
| Wetland        | Tree Cover, mixed leaf type              |      |                                                                                                                                                                                                                                                          | 23 | 6  | 0 | 1 | 63 |

|         |                                                 |  |  |    |    |   |    |    |
|---------|-------------------------------------------------|--|--|----|----|---|----|----|
| Wetland | Tree Cover, mixed leaf type                     |  |  | 23 | 6  | 0 | 4  | 63 |
| Wetland | Tree Cover, mixed leaf type                     |  |  | 23 | 6  | 0 | M  | 63 |
| Wetland | Tree Cover, mixed leaf type                     |  |  | 23 | 6  | 0 | Xf | 63 |
| Wetland | Tree Cover, mixed leaf type                     |  |  | 23 | 6  | 0 | U  | 55 |
| Wetland | Tree Cover, mixed leaf type                     |  |  | 23 | 6  | 0 | W  | 60 |
| Wetland | Shrub Cover, closed-open, deciduous             |  |  | 23 | 12 | 0 | 0  | 60 |
| Wetland | Shrub Cover, closed-open, deciduous             |  |  | 23 | 12 | 0 | 6  | 60 |
| Wetland | Regularly flooded shrub and/or herbaceous cover |  |  | 23 | 15 | 0 | 0  | 60 |
| Wetland | Regularly flooded shrub and/or herbaceous cover |  |  | 23 | 15 | 0 | 9  | 60 |
| Wetland | Regularly flooded shrub and/or herbaceous cover |  |  | 23 | 15 | 0 | E  | 60 |

|               |                                  |           |                                                                    |    |    |   |        |    |
|---------------|----------------------------------|-----------|--------------------------------------------------------------------|----|----|---|--------|----|
| Alpine        | Herbaceous Cover,<br>closed-open |           |                                                                    | 24 | 13 | 0 | 0      | 58 |
| Alpine        | Herbaceous Cover,<br>closed-open |           |                                                                    | 24 | 13 | 0 | M      | 54 |
| Natural Grass | Tree Cover<br>broadleaved        |           |                                                                    | 25 | 2  | 0 | 0      | 56 |
| Natural Grass | Tree Cover<br>broadleaved        |           | Human-made wetlands, 1:<br>Aquaculture                             | 25 | 2  | 0 | 1      | 78 |
| Natural Grass | Tree Cover<br>broadleaved        |           | Human-made wetlands, 4:<br>Seasonally flooded agricultural<br>land | 25 | 2  | 0 | 4      | 81 |
| Natural Grass | Tree Cover<br>broadleaved        |           | Human-made wetlands, 6:<br>Water storage areas                     | 25 | 2  | 0 | 6      | 78 |
| Natural Grass | Tree Cover<br>broadleaved        |           | Inland wetlands, M: Permanent<br>rivers/ streams/ creeks           | 25 | 2  | 0 | M      | 47 |
| Natural Grass | Tree Cover<br>broadleaved        |           | Inland wetlands, W: Shrub-<br>dominated wetlands                   | 25 | 2  | 0 | W      | 60 |
| Natural Grass | Tree Cover<br>broadleaved        |           | Inland wetlands, Xf:<br>Freshwater, tree-dominated<br>wetlands     | 25 | 2  | 0 | Xf     | 63 |
| Natural Grass | Tree Cover<br>broadleaved        |           | Inland wetlands, Y: Freshwater<br>springs; oases                   | 25 | 2  | 0 | Y      | 48 |
| Natural Grass | Tree Cover<br>broadleaved        | Lake      |                                                                    | 25 | 2  |   | 0<br>1 | 41 |
| Natural Grass | Tree Cover<br>broadleaved        | Reservoir |                                                                    | 25 | 2  |   | 0<br>2 | 78 |
| Natural Grass | Tree Cover<br>broadleaved        | River     |                                                                    | 25 | 2  |   | 0<br>3 | 46 |



|               |                                      |       |                                                                                          |    |   |   |    |    |
|---------------|--------------------------------------|-------|------------------------------------------------------------------------------------------|----|---|---|----|----|
| Natural Grass | Tree Cover, needle-leaved, evergreen |       | Inland wetlands, Xf: Freshwater, tree-dominated wetlands                                 | 25 | 4 | 0 | Xf | 63 |
| Natural Grass | Tree Cover, needle-leaved, evergreen |       | Inland wetlands, Y: Freshwater springs; oases                                            | 25 | 4 | 0 | Y  | 48 |
| Natural Grass | Tree Cover, needle-leaved, evergreen | Lake  |                                                                                          | 25 | 4 | 1 | 0  | 41 |
| Natural Grass | Tree Cover, needle-leaved, evergreen | Lake  | Inland wetlands, Tp: Permanent freshwater marshes/ pools                                 | 25 | 4 | 1 | Tp | 51 |
| Natural Grass | Tree Cover, needle-leaved, evergreen | Lake  | Inland wetlands, U: Non-forested peatlands                                               | 25 | 4 | 1 | U  | 55 |
| Natural Grass | Tree Cover, needle-leaved, evergreen | Lake  | Inland wetlands, Xf: Freshwater, tree-dominated wetlands                                 | 25 | 4 | 1 | Xf | 63 |
| Natural Grass | Tree Cover, needle-leaved, evergreen | River |                                                                                          | 25 | 4 | 3 | 0  | 46 |
| Natural Grass | Tree Cover, needle-leaved, evergreen | River | Inland wetlands, Ts: Seasonal/ intermittent freshwater marshes/ pools on inorganic soils | 25 | 4 | 3 | Ts | 53 |
| Natural Grass | Tree Cover, mixed leaf type          |       |                                                                                          | 25 | 6 | 0 | 0  | 56 |
| Natural Grass | Tree Cover, mixed leaf type          |       | Inland wetlands, Ts: Seasonal/ intermittent freshwater marshes/ pools on inorganic soils | 25 | 6 | 0 | Ts | 53 |
| Natural Grass | Tree Cover, mixed leaf type          |       | Inland wetlands, U: Non-forested peatlands                                               | 25 | 6 | 0 | U  | 55 |

|               |                                     |                               |                                                                                    |    |    |   |    |    |
|---------------|-------------------------------------|-------------------------------|------------------------------------------------------------------------------------|----|----|---|----|----|
| Natural Grass | Tree Cover, mixed leaf type         |                               | Inland wetlands, W: Shrub-dominated wetlands                                       | 25 | 6  | 0 | W  | 60 |
| Natural Grass | Tree Cover, mixed leaf type         |                               | Inland wetlands, Xf: Freshwater, tree-dominated wetlands                           | 25 | 6  | 0 | Xf | 63 |
| Natural Grass | Tree Cover, mixed leaf type         | Lake                          |                                                                                    | 25 | 6  | 1 | 0  | 41 |
| Natural Grass | Tree Cover, mixed leaf type         | River                         |                                                                                    | 25 | 6  | 3 | 0  | 46 |
| Natural Grass | Tree Cover, mixed leaf type         | Freshwater Marsch, Floodplain |                                                                                    | 25 | 6  | 4 | 0  | 51 |
| Natural Grass | Shrub Cover, closed-open, deciduous |                               |                                                                                    | 25 | 12 | 0 | 0  | 59 |
| Natural Grass | Herbaceous Cover, closed-open       |                               |                                                                                    | 25 | 13 | 0 | 0  | 56 |
| Natural Grass | Herbaceous Cover, closed-open       |                               | Inland wetlands, M: Permanent rivers/ streams/ creeks                              | 25 | 13 | 0 | M  | 47 |
| Natural Grass | Herbaceous Cover, closed-open       |                               | Inland wetlands, R: Seasonal/intermittent saline/brackish/alkaline lakes and flats | 25 | 13 | 0 | R  | 45 |
| Natural Grass | Herbaceous Cover, closed-open       |                               | Inland wetlands, W: Shrub-dominated wetlands                                       | 25 | 13 | 0 | W  | 60 |
| Natural Grass | Herbaceous Cover, closed-open       | Lake                          |                                                                                    | 25 | 13 | 1 | 0  | 41 |

|               |                                                 |                             |                                                                                       |    |    |   |      |    |
|---------------|-------------------------------------------------|-----------------------------|---------------------------------------------------------------------------------------|----|----|---|------|----|
| Natural Grass | Herbaceous Cover, closed-open                   | Pan, Brakish/Saline Wetland |                                                                                       | 25 | 13 | 6 | Ss   | 52 |
| Natural Grass | Herbaceous Cover, closed-open                   | Bog, Fen, Mire (Peatland)   |                                                                                       | 25 | 13 | 7 | 0    | 55 |
| Natural Grass | Sparse herbaceous or sparse shrub cover         |                             |                                                                                       | 25 | 14 | 0 | 0    | 79 |
| Natural Grass | Sparse herbaceous or sparse shrub cover         |                             |                                                                                       | 25 | 14 | 0 | O/Tp | 57 |
| Natural Grass | Regularly flooded shrub and/or herbaceous cover |                             |                                                                                       | 25 | 15 | 0 | 0    | 57 |
| Natural Grass | Cultivated and managed areas                    | Lake                        |                                                                                       | 25 | 16 | 1 | 0    |    |
| Natural Grass | Cultivated and managed areas                    | Lake                        | Human-made wetlands, E:                                                               | 25 | 16 | 1 | E    | 80 |
| Natural Grass | Cultivated and managed areas                    | Lake                        | Inland wetlands, Sp:                                                                  | 25 | 16 | 1 | Sp   | 52 |
| Natural Grass | Cultivated and managed areas                    | Lake                        | Inland wetlands, Tp:                                                                  | 25 | 16 | 1 | Tp   | 51 |
| Natural Grass | Cultivated and managed areas                    | Lake                        | Inland wetlands, R:<br>Seasonal/intermittent saline/brackish/alkaline lakes and flats | 25 | 16 | 1 | R    | 45 |
| Natural Grass | Cultivated and managed areas                    | Lake                        | Inland wetlands, Ss:                                                                  | 25 | 16 | 1 | Ss   | 52 |

|               |                                                          |                               |                              |    |    |   |    |    |
|---------------|----------------------------------------------------------|-------------------------------|------------------------------|----|----|---|----|----|
| Natural Grass | Cultivated and managed areas                             | Lake                          | Human-made wetlands, 1       | 25 | 16 | 1 | 1  | 78 |
| Natural Grass | Cultivated and managed areas                             | River                         |                              | 25 | 16 | 3 | 0  | 46 |
| Natural Grass | Cultivated and managed areas                             | River                         | Human-made wetlands, 6:      | 25 | 16 | 3 | 6  | 78 |
| Natural Grass | Cultivated and managed areas                             | River                         | Human-made wetlands, 7:      | 25 | 16 | 3 | 7  | 78 |
| Natural Grass | Cultivated and managed areas                             | Freshwater Marsch, Floodplain |                              | 25 | 16 | 4 | 0  | 51 |
| Natural Grass | Cultivated and managed areas                             | Coastal Wetland               |                              | 25 | 16 | 5 | 0  | 80 |
| Natural Grass | Cultivated and managed areas                             | Pan, Brakish/Saline Wetland   | Marine/ Coastal wetlands, E: | 25 | 16 | 5 | E  | 80 |
| Natural Grass | Cultivated and managed areas                             | Pan, Brakish/Saline Wetland   |                              | 25 | 16 | 6 | 0  | 52 |
| Natural Grass | Cultivated and managed areas                             | Pan, Brakish/Saline Wetland   | Inland wetlands, W:          | 25 | 16 | 6 | W  | 52 |
| Natural Grass | Cultivated and managed areas                             | Pan, Brakish/Saline Wetland   | Inland wetlands, Ss:         | 25 | 16 | 6 | Ss | 52 |
| Natural Grass | Mosaic: Cropland / Tree Cover / Other natural vegetation |                               |                              | 25 | 17 | 0 | 0  | 56 |



|               |                                             |                               |                                     |    |    |   |        |    |
|---------------|---------------------------------------------|-------------------------------|-------------------------------------|----|----|---|--------|----|
| Natural Grass | Mosaic: Cropland / Shrub and/or grass cover |                               |                                     | 25 | 18 | 0 | 0      | 56 |
| Natural Grass | Water Bodies                                |                               |                                     | 25 | 20 | 0 | 0      | 56 |
| Natural Grass | Water Bodies                                |                               | Xf                                  | 25 | 20 | 0 | Xf     | 63 |
| Natural Grass | Water Bodies                                |                               | Tp                                  | 25 | 20 | 0 | Tp     | 51 |
| Natural Grass | Water Bodies                                |                               | 4                                   | 25 | 20 | 0 | 4      | 81 |
| Natural Grass | Water Bodies                                | Lake                          |                                     | 25 | 20 | 1 | 0      | 41 |
| Natural Grass | Water Bodies                                | River                         |                                     | 25 | 20 | 3 | 0      | 46 |
| Natural Grass | Water Bodies                                | Freshwater Marsch, Floodplain |                                     | 25 | 20 | 4 | 0      | 51 |
| Natural Grass | Water Bodies                                | Coastal Wetland               |                                     | 25 | 20 | 5 | 0      | 80 |
| Natural Grass | Water Bodies                                | Coastal Wetland               | E                                   | 25 | 20 | 5 | E      | 80 |
| Natural Grass | Snow and Ice                                |                               |                                     | 25 | 21 | 0 | 0      | 56 |
| Natural Grass | Tree Cover, mixed leaf type                 |                               | Human-made wetlands, 7: Excavations | 25 | 6  |   | 7<br>0 | 78 |
| Water         | Tree Cover, broadleaved, deciduous, closed  |                               |                                     | 27 | 2  | 0 | 0      | 63 |

|       |                                                  |  |                                                                                                                                                                                                                                                                                            |    |   |   |   |    |
|-------|--------------------------------------------------|--|--------------------------------------------------------------------------------------------------------------------------------------------------------------------------------------------------------------------------------------------------------------------------------------------|----|---|---|---|----|
| Water | Tree Cover,<br>broadleaved,<br>deciduous, closed |  | Human-made wetlands, 1:<br>Aquaculture ponds, Inland<br>wetlands, Xf: Freshwater, tree-<br>dominated wetlands, Ts:<br>Seasonal/ intermittent<br>freshwater marshes/ pools on<br>inorganic soils, Tp: Permanent<br>freshwater marshes/ pools, O:<br>Permanent freshwater lakes,<br>M: Perma | 27 | 2 | 0 | 1 | 63 |
| Water | Tree Cover,<br>broadleaved,<br>deciduous, closed |  | Human-made wetlands, 6:<br>Water storage areas                                                                                                                                                                                                                                             | 27 | 2 | 0 | 6 | 63 |
| Water | Tree Cover,<br>broadleaved,<br>deciduous, closed |  | Inland wetlands, M: Permanent<br>rivers/ streams/ creeks                                                                                                                                                                                                                                   | 27 | 2 | 0 | M | 47 |
| Water | Tree Cover,<br>broadleaved,<br>deciduous, closed |  | Inland wetlands, N:<br>Seasonal/intermittent/irregula<br>r rivers/ streams creeks                                                                                                                                                                                                          | 27 | 2 | 0 | N | 49 |

|       |                                                  |                                     |                                                                                                                                                                                                                                                                                           |    |   |   |    |    |
|-------|--------------------------------------------------|-------------------------------------|-------------------------------------------------------------------------------------------------------------------------------------------------------------------------------------------------------------------------------------------------------------------------------------------|----|---|---|----|----|
| Water | Tree Cover,<br>broadleaved,<br>deciduous, closed |                                     | Inland wetlands, Ts: Seasonal/<br>intermittent freshwater<br>marshes/ pools on inorganic<br>soils, W: Shrub-dominated<br>wetlands, M: Permanent<br>rivers/ streams/ creeks, Xf:<br>Freshwater, tree-dominated<br>wetlands, O: Permanent<br>freshwater lakes, N: Seasonal/<br>intermittent | 27 | 2 | 0 | Ts | 53 |
| Water | Tree Cover,<br>broadleaved,<br>deciduous, closed |                                     | Inland wetlands, W: Shrub-<br>dominated wetlands, Xf:<br>Freshwater, tree-dominated<br>wetlands, Tp: Permanent<br>freshwater marshes/ pools, P:<br>Seasonal/ intermittent<br>freshwater lakes, O:<br>Permanent freshwater lakes                                                           | 27 | 2 | 0 | W  | 60 |
| Water | Tree Cover,<br>broadleaved,<br>deciduous, closed | Freshwater<br>Marsch,<br>Floodplain |                                                                                                                                                                                                                                                                                           | 27 | 2 | 4 | 0  | 51 |
| Water | Tree Cover,<br>broadleaved,<br>deciduous, closed | Freshwater<br>Marsch,<br>Floodplain | Human-made wetlands, 6:<br>Water storage areas                                                                                                                                                                                                                                            | 27 | 2 | 4 | 6  | 51 |
| Water | Tree Cover,<br>broadleaved,<br>deciduous, closed | Coastal Wetland                     |                                                                                                                                                                                                                                                                                           | 27 | 2 | 5 | 0  | 80 |

|       |                                            |                 |                                                                                                                                                                                                                                                                |    |   |   |   |    |
|-------|--------------------------------------------|-----------------|----------------------------------------------------------------------------------------------------------------------------------------------------------------------------------------------------------------------------------------------------------------|----|---|---|---|----|
| Water | Tree Cover, broadleaved, deciduous, closed | Coastal Wetland | Marine or coastal wetlands, E: Sand, shingle or pebble shores, F: Estuarine waters, Inland wetlands, M: Permanent rivers/ streams/ creeks, O: Permanent freshwater lakes, P: Seasonal/ intermittent freshwater lakes, Tp: Permanent freshwater marshes/ pools, | 27 | 2 | 5 | E | 80 |
| Water | Tree Cover, needle-leaved, evergreen       |                 |                                                                                                                                                                                                                                                                | 27 | 4 | 0 | 0 | 63 |
| Water | Tree Cover, needle-leaved, evergreen       |                 | Human-made wetlands, 1: Aquaculture ponds, Inland wetlands, Xf: Freshwater, tree-dominated wetlands, Ts: Seasonal/ intermittent freshwater marshes/ pools on inorganic soils, Tp: Permanent freshwater marshes/ pools, O: Permanent freshwater lakes, M: Perma | 27 | 4 | 0 | 1 | 63 |

|       |                                      |  |                                                                                                                                                                                                                                                                |    |   |   |   |    |
|-------|--------------------------------------|--|----------------------------------------------------------------------------------------------------------------------------------------------------------------------------------------------------------------------------------------------------------------|----|---|---|---|----|
| Water | Tree Cover, needle-leaved, evergreen |  | Human-made wetlands, 4: Seasonally flooded agricultural land, 6: Water storage areas/Reservoirs, Inland wetlands, M: Permanent rivers/ streams/ creeks, Tp: Permanent freshwater marshes/ pools, Ts: Seasonal/ intermittent freshwater marshes/ pools on inorg | 27 | 4 | 0 | 4 | 81 |
| Water | Tree Cover, needle-leaved, evergreen |  | Human-made wetlands, 6: Water storage areas                                                                                                                                                                                                                    | 27 | 4 | 0 | 6 | 63 |
| Water | Tree Cover, needle-leaved, evergreen |  | Human-made wetlands, 7: Excavations                                                                                                                                                                                                                            | 27 | 4 | 0 | 7 | 78 |
| Water | Tree Cover, needle-leaved, evergreen |  | Marine or coastal wetlands, E: Sand, shingle or pebble shores, F: Estuarine waters, Inland wetlands, M: Permanent rivers/ streams/ creeks, O: Permanent freshwater lakes, P: Seasonal/ intermittent freshwater lakes, Tp: Permanent freshwater marshes/ pools, | 27 | 4 | 0 | E | 80 |
| Water | Tree Cover, needle-leaved, evergreen |  | Inland wetlands, M: Permanent rivers/ streams/ creeks                                                                                                                                                                                                          | 27 | 4 | 0 | M | 47 |

|       |                                      |  |                                                                                                                                                                                                                    |    |   |   |    |    |
|-------|--------------------------------------|--|--------------------------------------------------------------------------------------------------------------------------------------------------------------------------------------------------------------------|----|---|---|----|----|
| Water | Tree Cover, needle-leaved, evergreen |  | Inland wetlands, O: Permanent freshwater lakes                                                                                                                                                                     | 27 | 4 | 0 | O  | 42 |
| Water | Tree Cover, needle-leaved, evergreen |  | Inland wetlands, Tp: Permanent freshwater marshes/ pools                                                                                                                                                           | 27 | 4 | 0 | Tp | 51 |
| Water | Tree Cover, needle-leaved, evergreen |  | Inland wetlands, Ts: Seasonal/ intermittent freshwater marshes/ pools on inorganic soils, M: Permanent rivers/ streams/ creeks, Xf: Freshwater, tree-dominated wetlands, Human-made wetlands, 1: Aquaculture ponds | 27 | 4 | 0 | Ts | 53 |
| Water | Tree Cover, needle-leaved, evergreen |  | Inland wetlands, U: Permanent Non-forested peatlands, M: Permanent rivers/ streams/ creeks, O: Permanent freshwater lakes, Tp: Permanent freshwater marshes/ pools                                                 | 27 | 4 | 0 | U  | 55 |
| Water | Tree Cover, needle-leaved, evergreen |  | Inland wetlands, W: Shrub-dominated wetlands                                                                                                                                                                       | 27 | 4 | 0 | W  | 60 |

|       |                                      |                               |                                                                                                                                                                                                                                         |    |   |   |    |    |
|-------|--------------------------------------|-------------------------------|-----------------------------------------------------------------------------------------------------------------------------------------------------------------------------------------------------------------------------------------|----|---|---|----|----|
| Water | Tree Cover, needle leaved, evergreen |                               | Inland wetlands, Xf:<br>Freshwater, tree-dominated wetlands, M: Permanent rivers/ streams/ creeks, Tp: Permanent freshwater marshes/ pools, U: Permanent Non-forested peatlands, Human-made wetlands, 6: Water storage areas/Reservoirs | 27 | 4 | 0 | Xf | 63 |
| Water | Tree Cover, needle leaved, evergreen | Freshwater Marsch, Floodplain |                                                                                                                                                                                                                                         | 27 | 4 | 4 | 0  | 51 |
| Water | Tree Cover, needle leaved, evergreen | Freshwater Marsch, Floodplain | Human-made wetlands, 6: Water storage areas                                                                                                                                                                                             | 27 | 4 | 4 | 6  | 78 |
| Water | Tree Cover, needle leaved, evergreen | Freshwater Marsch, Floodplain | Inland wetlands, M: Permanent rivers/ streams/ creeks                                                                                                                                                                                   | 27 | 4 | 4 | M  | 47 |
| Water | Tree Cover, needle leaved, evergreen | Freshwater Marsch, Floodplain | Inland wetlands, Tp: Permanent freshwater marshes/ pools                                                                                                                                                                                | 27 | 4 | 4 | Tp | 51 |
| Water | Tree Cover, needle leaved, evergreen | Freshwater Marsch, Floodplain | Inland wetlands, Xf:<br>Freshwater, tree-dominated wetlands                                                                                                                                                                             | 27 | 4 | 4 | Xf |    |
| Water | Tree Cover, needle leaved, evergreen | Coastal Wetland               |                                                                                                                                                                                                                                         | 27 | 4 | 5 | 0  | 80 |

|       |                                      |                 |                                                                                                                                                                                                                                                                |    |   |   |   |    |
|-------|--------------------------------------|-----------------|----------------------------------------------------------------------------------------------------------------------------------------------------------------------------------------------------------------------------------------------------------------|----|---|---|---|----|
| Water | Tree Cover, needle-leaved, evergreen | Coastal Wetland | Marine or coastal wetlands, E: Sand, shingle or pebble shores, F: Estuarine waters, Inland wetlands, M: Permanent rivers/ streams/ creeks, O: Permanent freshwater lakes, P: Seasonal/ intermittent freshwater lakes, Tp: Permanent freshwater marshes/ pools, | 27 | 4 | 5 | E | 80 |
| Water | Tree Cover, mixed leaf type          |                 |                                                                                                                                                                                                                                                                | 27 | 6 | 0 | 0 | 69 |
| Water | Tree Cover, mixed leaf type          |                 | Human-made wetlands, 1: Aquaculture ponds, Inland wetlands, Xf: Freshwater, tree-dominated wetlands, Ts: Seasonal/ intermittent freshwater marshes/ pools on inorganic soils, Tp: Permanent freshwater marshes/ pools, O: Permanent freshwater lakes, M: Perma | 27 | 6 | 0 | 1 | 78 |



|       |                             |  |                                                                                                                                                                                                                                                                |    |   |   |    |    |
|-------|-----------------------------|--|----------------------------------------------------------------------------------------------------------------------------------------------------------------------------------------------------------------------------------------------------------------|----|---|---|----|----|
| Water | Tree Cover, mixed leaf type |  | Human-made wetlands, 4: Seasonally flooded agricultural land, 7: Excavations, 9: Canals and drainage channels or ditches, Inland wetlands, M: Permanent rivers/ streams/ creeks, O: Permanent freshwater lakes, P: Seasonal/ intermittent freshwater lakes, Ts | 27 | 6 | 0 | 4  | 81 |
| Water | Tree Cover, mixed leaf type |  | Human-made wetlands, 7: Excavations                                                                                                                                                                                                                            | 27 | 6 | 0 | 7  | 78 |
| Water | Tree Cover, mixed leaf type |  | Inland wetlands, M: Permanent rivers/ streams/ creeks                                                                                                                                                                                                          | 27 | 6 | 0 | M  | 47 |
| Water | Tree Cover, mixed leaf type |  | Inland wetlands, Ts: Seasonal/ intermittent freshwater marshes/ pools on inorganic soils, M: Permanent rivers/ streams/ creeks, Xf: Freshwater, tree-dominated wetlands, Human-made wetlands, 1: Aquaculture ponds                                             | 27 | 6 | 0 | Ts | 53 |

|       |                             |                               |                                                                                                                                                                                                                                      |    |   |   |    |    |
|-------|-----------------------------|-------------------------------|--------------------------------------------------------------------------------------------------------------------------------------------------------------------------------------------------------------------------------------|----|---|---|----|----|
| Water | Tree Cover, mixed leaf type |                               | Inland wetlands, W: Shrub-dominated wetlands, Xf: Freshwater, tree-dominated wetlands, Tp: Permanent freshwater marshes/ pools, P: Seasonal/ intermittent freshwater lakes, O: Permanent freshwater lakes                            | 27 | 6 | 0 | W  | 60 |
| Water | Tree Cover, mixed leaf type |                               | Inland wetlands, Xf: Freshwater, tree-dominated wetlands, M: Permanent rivers/ streams/ creeks, Tp: Permanent freshwater marshes/ pools, U: Permanent Non-forested peatlands, Human-made wetlands, 6: Water storage areas/Reservoirs | 27 | 6 | 0 | Xf | 63 |
| Water | Tree Cover, mixed leaf type | Freshwater Marsch, Floodplain |                                                                                                                                                                                                                                      | 27 | 6 | 4 | 0  | 51 |
| Water | Tree Cover, mixed leaf type | Freshwater Marsch, Floodplain | Human-made wetlands, 6: Water storage areas                                                                                                                                                                                          | 27 | 6 | 4 | 6  | 51 |
| Water | Tree Cover, mixed leaf type | Coastal Wetland               |                                                                                                                                                                                                                                      | 27 | 6 | 5 | 0  | 80 |

|       |                                     |                 |                                                                                                                                                                                                                                                                |    |    |   |    |    |
|-------|-------------------------------------|-----------------|----------------------------------------------------------------------------------------------------------------------------------------------------------------------------------------------------------------------------------------------------------------|----|----|---|----|----|
| Water | Tree Cover, mixed leaf type         | Coastal Wetland | Marine or coastal wetlands, E: Sand, shingle or pebble shores, F: Estuarine waters, Inland wetlands, M: Permanent rivers/ streams/ creeks, O: Permanent freshwater lakes, P: Seasonal/ intermittent freshwater lakes, Tp: Permanent freshwater marshes/ pools, | 27 | 6  | 5 | E  | 80 |
| Water | Shrub Cover, closed-open, deciduous |                 |                                                                                                                                                                                                                                                                | 27 | 12 | 0 | 0  | 60 |
| Water | Herbaceous Cover, closed-open       |                 |                                                                                                                                                                                                                                                                | 27 | 13 | 0 | 0  | 57 |
| Water | Herbaceous Cover, closed-open       |                 | Human-made wetlands, 1: Aquaculture ponds, Inland wetlands, Xf: Freshwater, tree-dominated wetlands, Ts: Seasonal/ intermittent freshwater marshes/ pools on inorganic soils, Tp: Permanent freshwater marshes/ pools, O: Permanent freshwater lakes, M: Perma | 27 | 13 | 0 | 1  | 63 |
| Water | Herbaceous Cover, closed-open       |                 | Inland wetlands, Tp: Permanent freshwater marshes/ pools                                                                                                                                                                                                       | 27 | 13 | 0 | Tp | 51 |

|       |                                                 |  |                                                                                                                                                                                                           |    |    |   |   |    |
|-------|-------------------------------------------------|--|-----------------------------------------------------------------------------------------------------------------------------------------------------------------------------------------------------------|----|----|---|---|----|
| Water | Herbaceous Cover, closed-open                   |  | Inland wetlands, U: Non-forested peatlands                                                                                                                                                                | 27 | 13 | 0 | U |    |
| Water | Herbaceous Cover, closed-open                   |  | Inland wetlands, W: Shrub-dominated wetlands, Xf: Freshwater, tree-dominated wetlands, Tp: Permanent freshwater marshes/ pools, P: Seasonal/ intermittent freshwater lakes, O: Permanent freshwater lakes | 27 | 13 | 0 | W | 60 |
| Water | Sparse herbaceous or sparse shrub cover         |  |                                                                                                                                                                                                           | 27 | 14 | 0 | 0 | 51 |
| Water | Sparse herbaceous or sparse shrub cover         |  | Inland wetlands, M: Permanent rivers/streams/creeks                                                                                                                                                       | 27 | 14 | 0 | M | 47 |
| Water | Regularly flooded shrub and/or herbaceous cover |  |                                                                                                                                                                                                           | 27 | 15 | 0 | 0 | 60 |

|       |                                                 |                 |                                                                                                                                                                                                                                                                |    |    |   |   |    |
|-------|-------------------------------------------------|-----------------|----------------------------------------------------------------------------------------------------------------------------------------------------------------------------------------------------------------------------------------------------------------|----|----|---|---|----|
| Water | Regularly flooded shrub and/or herbaceous cover |                 | Marine or coastal wetlands, E: Sand, shingle or pebble shores, F: Estuarine waters, Inland wetlands, M: Permanent rivers/ streams/ creeks, O: Permanent freshwater lakes, P: Seasonal/ intermittent freshwater lakes, Tp: Permanent freshwater marshes/ pools, | 27 | 15 | 0 | E | 80 |
| Water | Regularly flooded shrub and/or herbaceous cover | Coastal Wetland |                                                                                                                                                                                                                                                                | 27 | 15 | 5 | 0 | 80 |
| Water | Regularly flooded shrub and/or herbaceous cover | Coastal Wetland | Human-made wetlands, 9: Cannals and drainage channels, ditches                                                                                                                                                                                                 | 27 | 15 | 5 | 9 | 80 |
| Water | Regularly flooded shrub and/or herbaceous cover | Coastal Wetland | Marine or coastal wetlands, E: Sand, shingle or pebble shores, F: Estuarine waters, Inland wetlands, M: Permanent rivers/ streams/ creeks, O: Permanent freshwater lakes, P: Seasonal/ intermittent freshwater lakes, Tp: Permanent freshwater marshes/ pools, | 27 | 15 | 5 | E | 80 |

|       |                              |  |                                                                                                                                                                                                                                                                |    |    |   |   |     |
|-------|------------------------------|--|----------------------------------------------------------------------------------------------------------------------------------------------------------------------------------------------------------------------------------------------------------------|----|----|---|---|-----|
| Water | Cultivated and managed areas |  |                                                                                                                                                                                                                                                                | 27 | 16 | 0 | 0 | 101 |
| Water | Cultivated and managed areas |  | Human-made wetlands, 1: Aquaculture ponds, 2: Ponds, 9: Canals and drainage channels or ditches, 4: Seasonally flooded agricultural land, Inland wetlands, O: Permanent freshwater lakes, Tp: Permanent freshwater marshes/ pools, M: Permanent rivers/ stream | 27 | 16 | 0 | 1 | 78  |
| Water | Cultivated and managed areas |  | Human-made wetlands, 2: Ponds                                                                                                                                                                                                                                  | 27 | 16 | 0 | 2 | 78  |
| Water | Cultivated and managed areas |  | Human-made wetlands, 4: Seasonally flooded agricultural land, 6: Water storage areas/Reservoirs, Inland wetlands, M: Permanent rivers/ streams/ creeks, Tp: Permanent freshwater marshes/ pools, Ts: Seasonal/ intermittent freshwater marshes/ pools on inorg | 27 | 16 | 0 | 4 | 81  |
| Water | Cultivated and managed areas |  | Human-made wetlands, 6: Water storage areas                                                                                                                                                                                                                    | 27 | 16 | 0 | 6 | 78  |
| Water | Cultivated and managed areas |  | Human-made wetlands, 7: Excavations                                                                                                                                                                                                                            | 27 | 16 | 0 | 7 | 78  |

|       |                              |  |                                                                                                                                                                                                                                                                                           |    |    |   |   |    |
|-------|------------------------------|--|-------------------------------------------------------------------------------------------------------------------------------------------------------------------------------------------------------------------------------------------------------------------------------------------|----|----|---|---|----|
| Water | Cultivated and managed areas |  | Human-made wetlands, 9:<br>Cannals and drainage channels,<br>ditches                                                                                                                                                                                                                      | 27 | 16 | 0 | 9 | 78 |
| Water | Cultivated and managed areas |  | Marine or coastal wetlands, E:<br>Sand, shingle or pebble shores,<br>F: Estuarine waters, Inland<br>wetlands, M: Permanent<br>rivers/ streams/ creeks, O:<br>Permanent freshwater lakes, P:<br>Seasonal/ intermittent<br>freshwater lakes, Tp:<br>Permanent freshwater<br>marshes/ pools, | 27 | 16 | 0 | E | 80 |
| Water | Cultivated and managed areas |  | Inland wetlands, L: Permanent<br>inland deltas                                                                                                                                                                                                                                            | 27 | 16 | 0 | L | 47 |
| Water | Cultivated and managed areas |  | Inland wetlands, M: Permanent<br>rivers/streams/creeks                                                                                                                                                                                                                                    | 27 | 16 | 0 | M | 47 |
| Water | Cultivated and managed areas |  | Inland wetlands, R:<br>Seasonal/intermittent<br>saline/brackish/alkaline lakes<br>and flats                                                                                                                                                                                               | 27 | 16 | 0 | R |    |

|       |                              |  |                                                                                                                                                                                                                                            |    |    |   |    |    |
|-------|------------------------------|--|--------------------------------------------------------------------------------------------------------------------------------------------------------------------------------------------------------------------------------------------|----|----|---|----|----|
| Water | Cultivated and managed areas |  | Inland wetlands, Sp: Permanent saline/ brackish/ alkaline marshes/ pools, Marine or coastal wetlands, K: Coastal freshwater lagoons, J: Coastal brackish / saline lagoons, Human-made wetlands, 9: Canals and drainage channels or ditches | 27 | 16 | 0 | Sp | 52 |
| Water | Cultivated and managed areas |  | Inland wetlands, Tp: Permanent freshwater marshes/ pools                                                                                                                                                                                   | 27 | 16 | 0 | Tp | 51 |
| Water | Cultivated and managed areas |  | Inland wetlands, Ts: Seasonal/ intermittent freshwater marshes/ pools on inorganic soils, M: Permanent rivers/ streams/ creeks, Xf: Freshwater, tree-dominated wetlands, Human-made wetlands, 1: Aquaculture ponds                         | 27 | 16 | 0 | Ts | 53 |
| Water | Cultivated and managed areas |  | Inland-wetlands, U: Non-forested peatlands                                                                                                                                                                                                 | 27 | 16 | 0 | U  | 55 |



|       |                              |                               |                                                                                                                                                                                                                                      |    |    |   |    |    |
|-------|------------------------------|-------------------------------|--------------------------------------------------------------------------------------------------------------------------------------------------------------------------------------------------------------------------------------|----|----|---|----|----|
| Water | Cultivated and managed areas |                               | Inland wetlands, W: Shrub-dominated wetlands, Xf: Freshwater, tree-dominated wetlands, Tp: Permanent freshwater marshes/ pools, P: Seasonal/ intermittent freshwater lakes, O: Permanent freshwater lakes                            | 27 | 16 | 0 | W  | 60 |
| Water | Cultivated and managed areas |                               | Inland wetlands, Xf: Freshwater, tree-dominated wetlands, M: Permanent rivers/ streams/ creeks, Tp: Permanent freshwater marshes/ pools, U: Permanent Non-forested peatlands, Human-made wetlands, 6: Water storage areas/Reservoirs | 27 | 16 | 0 | Xf | 63 |
| Water | Cultivated and managed areas | Freshwater Marsch, Floodplain |                                                                                                                                                                                                                                      | 27 | 16 | 4 | 0  | 51 |
| Water | Cultivated and managed areas | Freshwater Marsch, Floodplain | Human-made wetlands, 6: Water storage areas                                                                                                                                                                                          | 27 | 16 | 4 | 6  | 78 |
| Water | Cultivated and managed areas | Freshwater Marsch, Floodplain | Inland wetlands, Tp: Permanent freshwater marshes/pools                                                                                                                                                                              | 27 | 16 | 4 | Tp | 51 |
| Water | Cultivated and managed areas | Coastal Wetland               |                                                                                                                                                                                                                                      | 27 | 16 | 5 | 0  | 80 |

|       |                              |                             |                                                                                                                                                                                                                                                                |    |    |   |    |    |
|-------|------------------------------|-----------------------------|----------------------------------------------------------------------------------------------------------------------------------------------------------------------------------------------------------------------------------------------------------------|----|----|---|----|----|
| Water | Cultivated and managed areas | Coastal Wetland             | Marine or coastal wetlands, E: Sand, shingle or pebble shores, F: Estuarine waters, Inland wetlands, M: Permanent rivers/ streams/ creeks, O: Permanent freshwater lakes, P: Seasonal/ intermittent freshwater lakes, Tp: Permanent freshwater marshes/ pools, | 27 | 16 | 5 | E  | 80 |
| Water | Cultivated and managed areas | Pan, Brakish/Saline Wetland | Inland wetlands, Ss: Seasonal/ intermittent saline/ brackish/ alkaline marshes/ pools, Q: Permanent saline/ brackish/ alkaline lakes, R: Seasonal/ intermittent saline/ brackish/ alkaline lakes and flats, Sp: Permanent saline/ brackish/ alkaline marshes/  | 27 | 16 | 6 | Ss | 52 |
| Water | Cultivated and managed areas | Pan, Brakish/Saline Wetland | Inland wetlands, W: Shrub-dominated wetlands, Q: Permanent saline/ brackish/ alkaline lakes, Ss: Seasonal/ intermittent saline/ brackish/ alkaline marshes/ pools, Human-made wetlands, 9: Canals and drainage channels or ditches                             | 27 | 16 | 6 | W  | 64 |

|       |                                                          |                               |                                                                                                                                                                                                                                                                |    |    |   |   |     |
|-------|----------------------------------------------------------|-------------------------------|----------------------------------------------------------------------------------------------------------------------------------------------------------------------------------------------------------------------------------------------------------------|----|----|---|---|-----|
| Water | Cultivated and managed areas                             | Intermittent Wetland/Lake     |                                                                                                                                                                                                                                                                | 27 | 16 | 8 | 0 | 43  |
| Water | Mosaic: Cropland / Tree Cover / Other natural vegetation |                               |                                                                                                                                                                                                                                                                | 27 | 17 | 0 | 0 | 101 |
| Water | Mosaic: Cropland / Tree Cover / Other natural vegetation | Freshwater Marsch, Floodplain |                                                                                                                                                                                                                                                                | 27 | 17 | 4 | 0 | 51  |
| Water | Mosaic: Cropland / Tree Cover / Other natural vegetation | Coastal Wetland               |                                                                                                                                                                                                                                                                | 27 | 17 | 5 | 0 | 80  |
| Water | Mosaic: Cropland / Tree Cover / Other natural vegetation | Coastal Wetland               | Marine or coastal wetlands, E: Sand, shingle or pebble shores, F: Estuarine waters, Inland wetlands, M: Permanent rivers/ streams/ creeks, O: Permanent freshwater lakes, P: Seasonal/ intermittent freshwater lakes, Tp: Permanent freshwater marshes/ pools, | 27 | 17 | 5 | E | 80  |
| Water | Mosaic: Cropland / Shrub and/or grass cover              |                               |                                                                                                                                                                                                                                                                | 27 | 18 | 0 | 0 | 101 |
| Water | Water Bodies                                             |                               |                                                                                                                                                                                                                                                                | 27 | 20 | 0 | 0 | 101 |

|       |              |  |                                                                                                                                                                                                                                                                                           |    |    |   |   |    |
|-------|--------------|--|-------------------------------------------------------------------------------------------------------------------------------------------------------------------------------------------------------------------------------------------------------------------------------------------|----|----|---|---|----|
| Water | Water Bodies |  | Human-made wetlands, 1:<br>Aquaculture                                                                                                                                                                                                                                                    | 27 | 20 | 0 | 1 | 78 |
| Water | Water Bodies |  | Human-made wetlands, 4:<br>Seasonally flooded agricultural<br>land, 6: Water storage<br>areas/Reservoirs, Inland<br>wetlands, M: Permanent<br>rivers/ streams/ creeks, Tp:<br>Permanent freshwater<br>marshes/ pools, Ts: Seasonal/<br>intermittent freshwater<br>marshes/ pools on inorg | 27 | 20 | 0 | 4 | 81 |
| Water | Water Bodies |  | Human-made wetlands, 7:<br>Excavations                                                                                                                                                                                                                                                    | 27 | 20 | 0 | 7 | 78 |
| Water | Water Bodies |  | Human-made wetlands, 9:<br>Cannals and drainage channels,<br>ditches                                                                                                                                                                                                                      | 27 | 20 | 0 | 9 | 78 |
| Water | Water Bodies |  | Marine or coastal wetlands, E:<br>Sand, shingle or pebble shores,<br>F: Estuarine waters, Inland<br>wetlands, M: Permanent<br>rivers/ streams/ creeks, O:<br>Permanent freshwater lakes, P:<br>Seasonal/ intermittent<br>freshwater lakes, Tp:<br>Permanent freshwater<br>marshes/ pools, | 27 | 20 | 0 | E | 80 |
| Water | Water Bodies |  | Inland wetlands, O: Permanent<br>freshwater lakes                                                                                                                                                                                                                                         | 27 | 20 | 0 | O | 42 |

|       |              |                               |                                                                                                                                                                                                                                                         |    |    |   |    |    |
|-------|--------------|-------------------------------|---------------------------------------------------------------------------------------------------------------------------------------------------------------------------------------------------------------------------------------------------------|----|----|---|----|----|
| Water | Water Bodies |                               | Inland wetlands, Tp: Permanent freshwater marshes/ pools                                                                                                                                                                                                | 27 | 20 | 0 | Tp | 51 |
| Water | Water Bodies |                               | Inland wetlands, Ts: Seasonal/ intermittent freshwater marshes/ pools on inorganic soils, Tp: Permanent freshwater marshes/ pools, O: Permanent freshwater lakes, Human-made wetlands, 1: Aquaculture ponds, 9: Canals and drainage channels or ditches | 27 | 20 | 0 | Ts | 53 |
| Water | Water Bodies |                               | Inland wetlands, W: Shrub-dominated wetlands                                                                                                                                                                                                            | 27 | 20 | 0 | W  | 60 |
| Water | Water Bodies |                               | Inland wetlands, Xf: Freshwater, tree-dominated wetlands, M: Permanent rivers/ streams/ creeks, Tp: Permanent freshwater marshes/ pools, U: Permanent Non-forested peatlands, Human-made wetlands, 6: Water storage areas/Reservoirs                    | 27 | 20 | 0 | Xf | 63 |
| Water | Water Bodies | Freshwater Marsch, Floodplain |                                                                                                                                                                                                                                                         | 27 | 20 | 4 | 0  | 51 |
| Water | Water Bodies | Freshwater Marsch, Floodplain | Inland wetlands, Xf: Freshwater, tree-dominated wetlands                                                                                                                                                                                                | 27 | 20 | 4 | Xf | 63 |

|       |                                                |                                     |                                                                                                                                                                                                                                                                                       |    |    |   |    |     |
|-------|------------------------------------------------|-------------------------------------|---------------------------------------------------------------------------------------------------------------------------------------------------------------------------------------------------------------------------------------------------------------------------------------|----|----|---|----|-----|
| Water | Water Bodies                                   | Coastal Wetland                     |                                                                                                                                                                                                                                                                                       | 27 | 20 | 5 | 0  | 80  |
| Water | Water Bodies                                   | Coastal Wetland                     | Marine or coastal wetlands, E:<br>Sand, shingle or pebble shores                                                                                                                                                                                                                      | 27 | 20 | 5 | E  | 80  |
| Water | Water Bodies                                   | Coastal Wetland                     | Inland wetlands, Ts:<br>Seasonal/intermittent<br>freshwater marshes/pools on<br>inorganic soils                                                                                                                                                                                       | 27 | 20 | 5 | Ts | 53  |
| Water | Water Bodies                                   | Pan,<br>Brackish/Saline<br>Wetland  | Inland wetlands, Ss: Seasonal/<br>intermittent saline/ brackish/<br>alkaline marshes/ pools, Q:<br>Permanent saline/ brackish/<br>alkaline lakes, R: Seasonal/<br>intermittent saline/ brackish/<br>alkaline lakes and flats, Sp:<br>Permanent saline/ brackish/<br>alkaline marshes/ | 27 | 20 | 6 | Ss | 52  |
| Water | Water Bodies                                   | Intermittent<br>Wetland/Lake        |                                                                                                                                                                                                                                                                                       | 27 | 20 | 8 | 0  | 43  |
| Water | Snow and Ice                                   |                                     |                                                                                                                                                                                                                                                                                       | 27 | 21 | 0 | 0  | 101 |
| Water | Artificial surfaces<br>and associated<br>areas |                                     |                                                                                                                                                                                                                                                                                       | 27 | 22 | 0 | 0  | 101 |
| Water | Artificial surfaces<br>and associated<br>areas | Freshwater<br>Marsch,<br>Floodplain |                                                                                                                                                                                                                                                                                       | 27 | 22 | 4 | 0  | 51  |
| Water | Artificial surfaces<br>and associated<br>areas | Freshwater<br>Marsch,<br>Floodplain | Inland wetlands, Tp:<br>Permanent freshwater<br>marshes/ pools                                                                                                                                                                                                                        | 27 | 22 | 4 | Tp | 51  |

|                  |                                            |                 |                                                                                                                                                                                                                                                                |    |     |     |     |    |
|------------------|--------------------------------------------|-----------------|----------------------------------------------------------------------------------------------------------------------------------------------------------------------------------------------------------------------------------------------------------------|----|-----|-----|-----|----|
| Water            | Artificial surfaces and associated areas   | Coastal Wetland |                                                                                                                                                                                                                                                                | 27 | 22  | 5   | 0   | 80 |
| Water            | Tree Cover, broadleaved, deciduous, closed |                 | Human-made wetlands, 4: Seasonally flooded agricultural land, 7: Excavations, 9: Canals and drainage channels or ditches, Inland wetlands, M: Permanent rivers/ streams/ creeks, O: Permanent freshwater lakes, P: Seasonal/ intermittent freshwater lakes, Ts | 27 | 2   | 0   | 4   | 63 |
| Rice             | 0-n                                        | 0-n             | 0-n                                                                                                                                                                                                                                                            | 31 | 0-n | 0-n | 0-n | 74 |
| Soybean          | 0-n                                        | 0-n             | 0-n                                                                                                                                                                                                                                                            | 33 | 0-n | 0-n | 0-n | 74 |
| Sunflower        | 0-n                                        | 0-n             | 0-n                                                                                                                                                                                                                                                            | 34 | 0-n | 0-n | 0-n | 74 |
| Cotton           | 0-n                                        | 0-n             | 0-n                                                                                                                                                                                                                                                            | 35 | 0-n | 0-n | 0-n | 74 |
| Vegetables       | 0-n                                        | 0-n             | 0-n                                                                                                                                                                                                                                                            | 36 | 0-n | 0-n | 0-n | 74 |
| Fruits & Berries | 0-n                                        | 0-n             | 0-n                                                                                                                                                                                                                                                            | 37 | 0-n | 0-n | 0-n | 74 |
| Wine             | 0-n                                        | 0-n             | 0-n                                                                                                                                                                                                                                                            | 38 | 0-n | 0-n | 0-n | 74 |
| Olives           | 0-n                                        | 0-n             | 0-n                                                                                                                                                                                                                                                            | 39 | 0-n | 0-n | 0-n | 74 |
| Winter Triticale | 0-n                                        | 0-n             | 0-n                                                                                                                                                                                                                                                            | 40 | 0-n | 0-n | 0-n | 74 |
| Water            | Tree Cover, needle-leaved, evergreen       |                 | Human-made wetlands, 9: Canals and drainage channels, ditches                                                                                                                                                                                                  | 27 | 4   | 0   | 9   | 78 |
