# Supplementary material for: Ecological Sustainability Assessment of Water Distribution for the Maintenance of Ecosystems, their Services and Biodiversity
Source: Springer Nature journal article supplement (doi:10.1007/s00267-022-01662-3), 2022-06-14
Supplement: MOESM3 [file 23162354]

## Environmental Management

### Ecological sustainability assessment of water distribution for the maintenance of ecosystems, their services and biodiversity

Anna Schlattmann<sup>1</sup>, Felix Neuendorf, Kremena Burkhard, Elisabeth Probst, Estanislao Pujades, Wolfram Mauser, Sabine Attinger, Christina von Haaren

<sup>1</sup>Leibniz University Hannover, Institute of Environmental Planning, Herrenhaeuserstr. 2, 30419 Hannover, Germany, schlattmann@umwelt.uni-hannover.de

#### Online Resource 3: Crosswalk EWD typology and EUNIS habitat classification with information on water dependence

| EWD Code | EWD-Layer                                                             | EUNIS Lvl 1* | EUNIS Lvl 2* | EUNIS Lvl 3*           | Water dependence**<br>( )= likely water source | Ecosystem group |
|----------|-----------------------------------------------------------------------|--------------|--------------|------------------------|------------------------------------------------|-----------------|
|          | Inland surface waters                                                 |              |              |                        |                                                |                 |
| 41       | Lakes                                                                 | C            | C1           |                        | w (aq)                                         | wetland         |
| 42       | Permanent freshwater lakes (>8ha), incl. Floodplain lakes             | C            | C1           | C1.1-C1.6              | w (aq)                                         | wetland         |
| 43       | Seasonal/Intermittent freshwater lakes (>8ha), incl. Floodplain lakes | C            | C1, C3       | C1.1-C1.4              | w (aq)                                         | wetland         |
| 44       | Permanent saline, brackish or alkaline lakes                          | C            | C1           | C1.6, C3               | w (aq)                                         | wetland         |
| 45       | Seasonal/Intermittent saline, brackish or alkaline lakes and flats    | C            | C1           | C1.5                   | w (aq)                                         | wetland         |
| 46       | Rivers                                                                | C            | C2           | C1.6, C3, C1.5         | w (aq)                                         | wetland         |
| 47       | Permanent Rivers, streams or creeks, incl. inland delatas             | C            | C2           | \                      | w (aq)                                         | wetland         |
| 48       | Freshwater springs, oases                                             | C            | C2           | C2.2, C2.3, C2.4, C2.6 | w (aq)                                         | wetland         |
| 49       | Seasonal/Intermittent Rivers, streams or creek                        | C            | C2           | C2.1                   | w (aq)                                         | wetland         |
| 50       | Wetlands (mires, bogs and fens)                                       | D/E/F        | \            | C2.5                   | w                                              | wetland         |

|                             |                                                                                                                                                                            |     |                        |                                |             |                   |
|-----------------------------|----------------------------------------------------------------------------------------------------------------------------------------------------------------------------|-----|------------------------|--------------------------------|-------------|-------------------|
| 51                          | Permanent freshwater marshes, pools, marshes and swamps on inorganic soils; with emergent vegetation water-logged for at least most of the growing season (herb dominated) | D   | D4, D5                 |                                |             |                   |
| 52                          | Permanent or seasonal wetlands, incl. Pan, Brackish/Saline/alkaline marshes or pools                                                                                       | D   | D6                     | \                              | w, (GW)     | wetland           |
| 53                          | Seasonal/Intermittent freshwater marshes/pools on inorganic soils, incl. Sloughs, potholes, seasonally flooded meadows, sedge marshes (Herb dominated)                     | D/E | D4, D5, (E3, E5)       | \                              | w, (GW)     | wetland           |
| 54                          | Alpine wetlands, incl. Alpine meadows, temporary waters from snow melt                                                                                                     | D/E | D1, D2, D3, D4, D5, E4 | \                              | w, (GW)     | wetland           |
| 55                          | Wetland, non-forested bogs, fens and mires, incl. Shrub cover                                                                                                              | D/F | D1, D2, D4, D5, F9     | \                              | w, (GW)     | wetland           |
| Grasslands                  |                                                                                                                                                                            |     |                        |                                |             |                   |
| 56                          | Natural Grass                                                                                                                                                              | E   | E1, E2, E5             | E1.1-E1.C, E2.1-E28, E5.1-E5.3 | t-b         | wetland           |
| 57                          | Wet grasslands and hydrophilous tall-forb stand, degenerated or drained wetlands                                                                                           | E/F | E3, E5, F4             | E3.1-E3.5, E5.4, E5.5, F4.1    | w, (GW/U/S) | wetland           |
| 58                          | Alpine grasslands                                                                                                                                                          | E   | E4                     | \                              | t-b         | wetland           |
| Heathland, shrub and tundra |                                                                                                                                                                            |     |                        |                                |             |                   |
| 59                          | Shrub Cover, closed-open, evergreen or deciduous                                                                                                                           | F   | F2-F8                  | \                              | t           | terrestrial/trees |
| 60                          | Wetland, regularly flooded with shrub or herbaceous vegetation on organic or inorganic soils                                                                               | F   | F9                     | F91-F9.3                       | w           | wetland           |
| 61                          | Tundra wetlands, incl. Tundra pools, temporary waters from snow melt                                                                                                       | F   | F1                     | \                              | w           | wetland           |

| Woodland, forest and other woodland |                                                                                                                                                                              |   |                              |                                                   |                            |                   |
|-------------------------------------|------------------------------------------------------------------------------------------------------------------------------------------------------------------------------|---|------------------------------|---------------------------------------------------|----------------------------|-------------------|
| 62                                  | Deciduous woodland, closed or open                                                                                                                                           | G | G1                           | G1.6, G1.7, G1.8, G1.9, G1.A, G1.B, G1.C, (G1.D)  | t-w<br>(predominantly dry) | terrestrial/trees |
| 63                                  | Regularly/seasonally flooded woodlands and tree-dominated wetlands, incl. Freshwater swamp forests, wooded swamps on inorganic soils, Forested peatlands, peat swamp forests | G | G1, G3, G4                   | G1.1, G1.2; G1.3, G3.D, G3.E, (G.1.4, G1.5), G4.1 | w                          | wetland           |
| 64                                  | Wetland, regularly flooded, saline water with tree cover                                                                                                                     | G | G1, G4                       | G1.1, G1.2, G1.3, G4.1                            | w<br>t-w                   | wetland           |
| 65                                  | Broadleaved evergreen woodland                                                                                                                                               | G | G2                           |                                                   | (predominantly dry)        | terrestrial/trees |
| 66                                  | Needle-leaved/coniferous, evergreen or deciduous woodland                                                                                                                    | G | G3                           | \                                                 | t-w<br>(predominantly dry) | terrestrial/trees |
| 68                                  | Mixed broadleaved and coniferous woodland                                                                                                                                    | G | G4                           | \                                                 | t-w<br>(predominantly dry) | terrestrial/trees |
| 70                                  | Tree Cover burnt                                                                                                                                                             | G | G5                           | G5.8                                              | t                          | terrestrial/trees |
| Complexes                           |                                                                                                                                                                              |   |                              |                                                   |                            |                   |
| 71                                  | Mosaic: Tree cover / Other natural vegetation                                                                                                                                | G | X09, X10, X13, X14, X15, X16 | \                                                 | t-w                        | terrestrial/trees |
| Other habitats beyond our scope     |                                                                                                                                                                              |   |                              |                                                   |                            |                   |
| 72                                  | Alpine mixed                                                                                                                                                                 | \ | \                            | \                                                 | t exclude                  | terrestrial/trees |
| 73                                  | Built up                                                                                                                                                                     | J | keine weitere Zuordnung      |                                                   | t exclude                  | artificial        |
| 74                                  | Crop Land                                                                                                                                                                    | I | keine weitere Zuordnung      |                                                   | t exclude                  | crop land         |
| 75                                  | Extensive Grassland                                                                                                                                                          | I | keine weitere Zuordnung      |                                                   | t exclude                  | terrestrial/trees |
| 76                                  | Intensive Grassland                                                                                                                                                          | I | keine weitere Zuordnung      |                                                   | t exclude                  | terrestrial/trees |

|    |                                                                                                                                                    |   |                             |                    |             |
|----|----------------------------------------------------------------------------------------------------------------------------------------------------|---|-----------------------------|--------------------|-------------|
| 77 | <b>Karst and other subterranean hydrological systems, inland</b>                                                                                   | H | keine weitere Zuordnung     | <b>w exclude</b>   | wetland     |
| 78 | <b>Artificial water bodies, reservoirs, treatment areas, channels, inc. combined with natural water bodies or wetlands or terrestrial habitats</b> | J | J5\ keine weitere Zuordnung |                    |             |
| 79 | <b>Unvegetated or sparsely vegetated habitats</b>                                                                                                  | H | keine weitere Zuordnung     | <b>w (anthrop)</b> | wetland     |
| 80 | <b>Marine or Coastal mixed landscapes (deltas)</b>                                                                                                 | A | keine weitere Zuordnung     | <b>t exclude</b>   | unspecified |
| 81 | <b>Human-made wetlands incl. Agricultural landscapes</b>                                                                                           |   |                             | <b>w (coast)</b>   | wetland     |
|    |                                                                                                                                                    |   |                             | <b>w (anthrop)</b> | wetland     |

#### Legend:

|                                   |                                                                                                                                                                                                                     |
|-----------------------------------|---------------------------------------------------------------------------------------------------------------------------------------------------------------------------------------------------------------------|
|                                   | = ecosystem types excluded from further GDE analysis                                                                                                                                                                |
| Water dependence/<br>water source | w = wet/wetland; t = dry/terrestrial; t-w = dry to wet; (aq) = aquatic ecosystem; (GW) = groundwater dependent; (U) = flooding; (S) = waterlogged; (anthrop) = anthropogenic ecosystem; (coast) = coastal ecosystem |

#### References:

\* EEA (2019): EUNIS habitat classification 2007 (Revised descriptions 2012) amended 2019; available at: <https://www.eea.europa.eu/data-and-maps/data/eunis-habitat-classification/habitats/eunis-habitats-complete-with-descriptions.xls>.

EC (2013): Interpretation Manual of the European Habitats EUR 28, European Commission DG Environment; available at: <https://ec.europa.eu/environment/nature/legislation/habitatsdirective/>

\*\* BfN (2006): Wasserrahmenrichtlinie, wasserabhängige Lebensraumtypen nach Anhang I der FFH-Richtlinie; available at: <https://www.bfn.de/themen/natura-2000/management/kooperation-mit-nutzern/grundwassernutzung.html>.

Reich, M.; Rode, M.; von Haaren, Christina & Weiß, C. (2012): Regionales Management von Klimafolgen in der Metropolregion Hannover-Braunschweig-Göttingen, Teilprojekt 4 Klimawandel: lokales und regionales Naturschutzmanagement. Anhang zum Schlussbericht. Institut für Umweltplanung, Hannover.
