# Supplementary material for: Ecological Sustainability Assessment of Water Distribution for the Maintenance of Ecosystems, their Services and Biodiversity
Source: Springer Nature journal article supplement (doi:10.1007/s00267-022-01662-3), 2022-06-14
Supplement: MOESM4 [file 23162354]

## Environmental Management

### **Ecological sustainability assessment of water distribution for the maintenance of ecosystems, their services and biodiversity**

Anna Schlattmann<sup>1</sup>, Felix Neuendorf, Kremena Burkhard, Elisabeth Probst, Estanislao Pujades, Wolfram Mauser, Sabine Attinger, Christina von Haaren

<sup>1</sup>Leibniz University Hannover, Institute of Environmental Planning, Herrenhaeuserstr. 2, 30419 Hannover, Germany, schlattmann@umwelt.uni-hannover.de

**Online Resource 4:** Additional maps and figures

# Ecosystem types in the Danube river basin

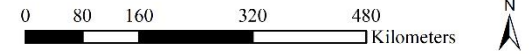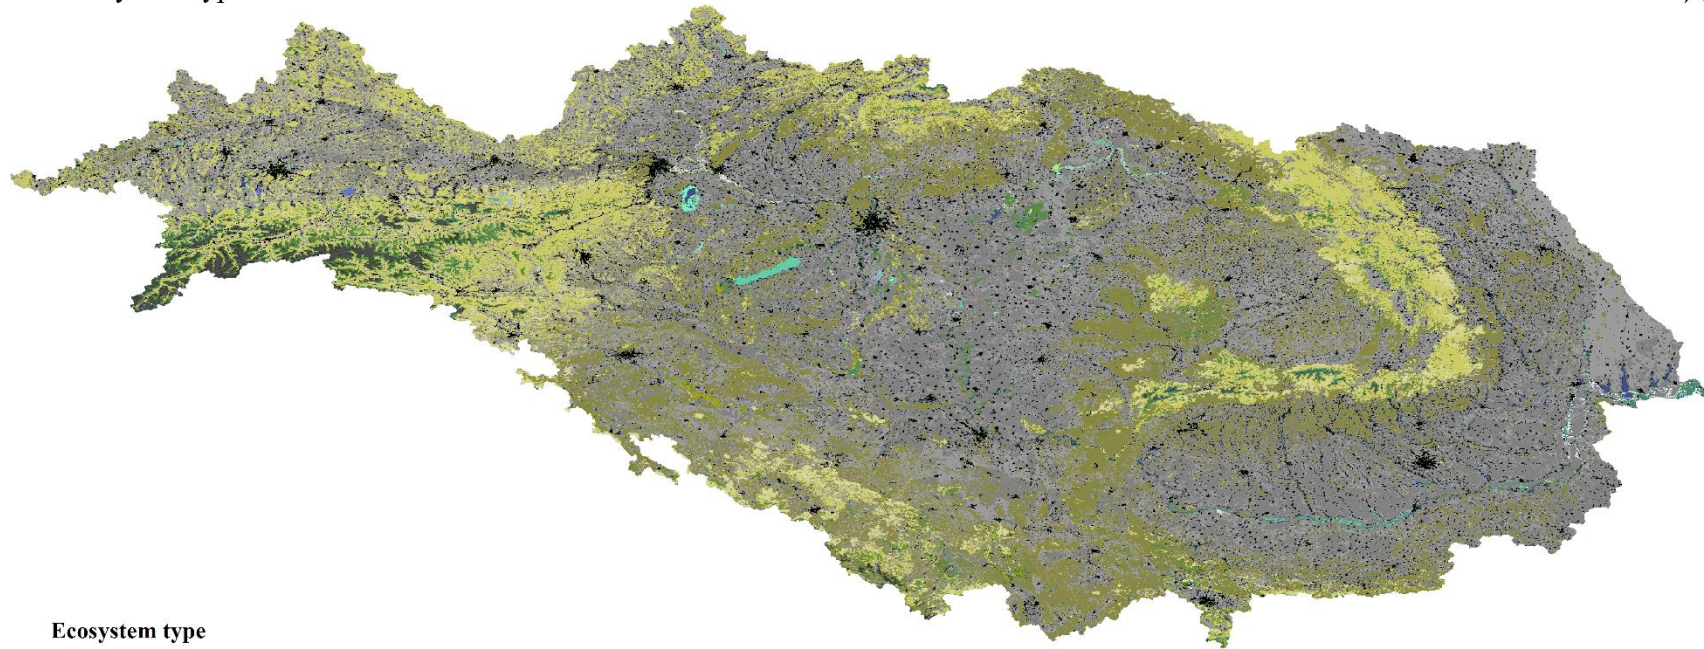

## Ecosystem type

|                                                                    |                                                                                                                                       |                                                                    |                                                                                            |
|--------------------------------------------------------------------|---------------------------------------------------------------------------------------------------------------------------------------|--------------------------------------------------------------------|--------------------------------------------------------------------------------------------|
| Inland surface waters                                              | Permanent freshwater marshes, pools, marshes and swamps on inorganic soils                                                            | Alpine grasslands                                                  | Unvegetated or sparsely vegetated habitats                                                 |
| Lakes                                                              | Permanent or seasonal wetlands, incl. Pan, Brackish/Saline/alkaline marshes or pools                                                  | Shrub Cover, closed-open, evergreen or deciduous                   | Karst and other subterranean hydrological systems, inland                                  |
| Permanent freshwater lakes                                         | Seasonal/Intermittent freshwater marshes/pools on inorganic soils, incl. Sloughs, potholes, seasonally flooded meadows, sedge marshes | Regularly/seasonally flooded woodlands and tree-dominated wetlands | Crop land                                                                                  |
| Seasonal/Intermittent freshwater lakes                             | Alpine wetlands, incl. Alpine meadows, temporary waters from snow melt                                                                | Wetland, regularly flooded, saline water with tree cover           | Extensive Grassland                                                                        |
| Seasonal/Intermittent saline, brackish or alkaline lakes and flats | Wetland, non-forested bogs, fens and mires, incl. Shrub cover                                                                         | Deciduous woodland, closed or open                                 | Intensive grassland                                                                        |
| Rivers                                                             | Wetland, regularly flooded with shrub or herbaceous vegetation on organic or inorganic soils                                          | Needle-leaved/coniferous, evergreen or deciduous woodland          | Human-made wetlands incl. agricultural landscapes                                          |
| Permanent Rivers, streams or creeks, incl. inland delatas          | Wet grasslands and hydrophilous tall-forb stand, degenerated or drained wetlands                                                      | Mixed broadleaved and coniferous woodland                          | Artificial water bodies, reservoirs, treatment areas, channels, inc. combined with natural |
| Freshwater springs, oases                                          | Natural Grass                                                                                                                         | Mosaic: Tree cover / Other natural vegetation                      | Marine or Coastal mixed landscapes                                                         |
| Seasonal/Intermittent Rivers, streams or creek                     |                                                                                                                                       | Built up                                                           |                                                                                            |
| Wetlands (mires, bogs and fens)                                    |                                                                                                                                       | Alpine mixed                                                       |                                                                                            |

Figure 1: Ecosystem types in the Danube river basin according to the EWD typology.

## Ecosystem groups in the Danube river basin

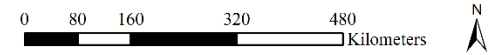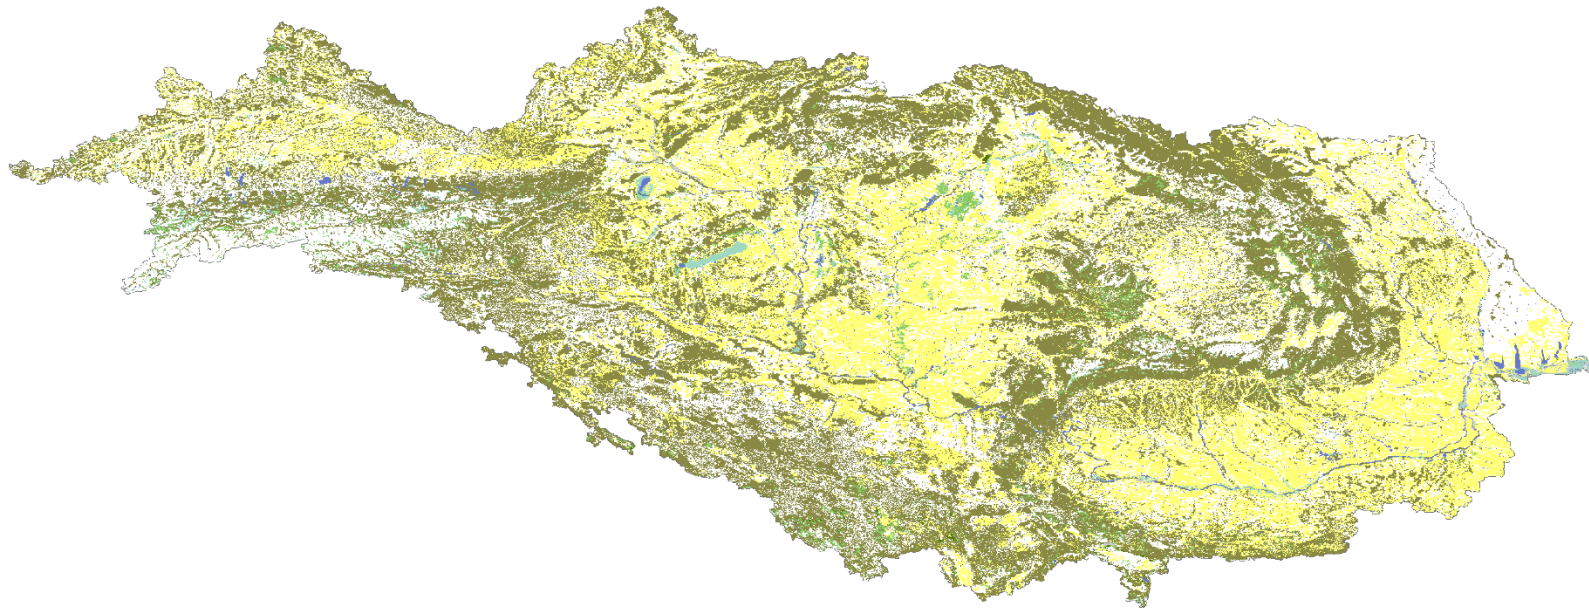

### Ecosystem groups

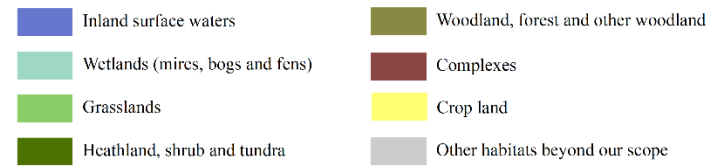

Figure 2: Ecosystem groups in the Danube river basin according to the EWD typology

Non-agriculturally used ecosystems in the Danube river basin  
(NABES)

0 80 160 320 480 Kilometers

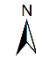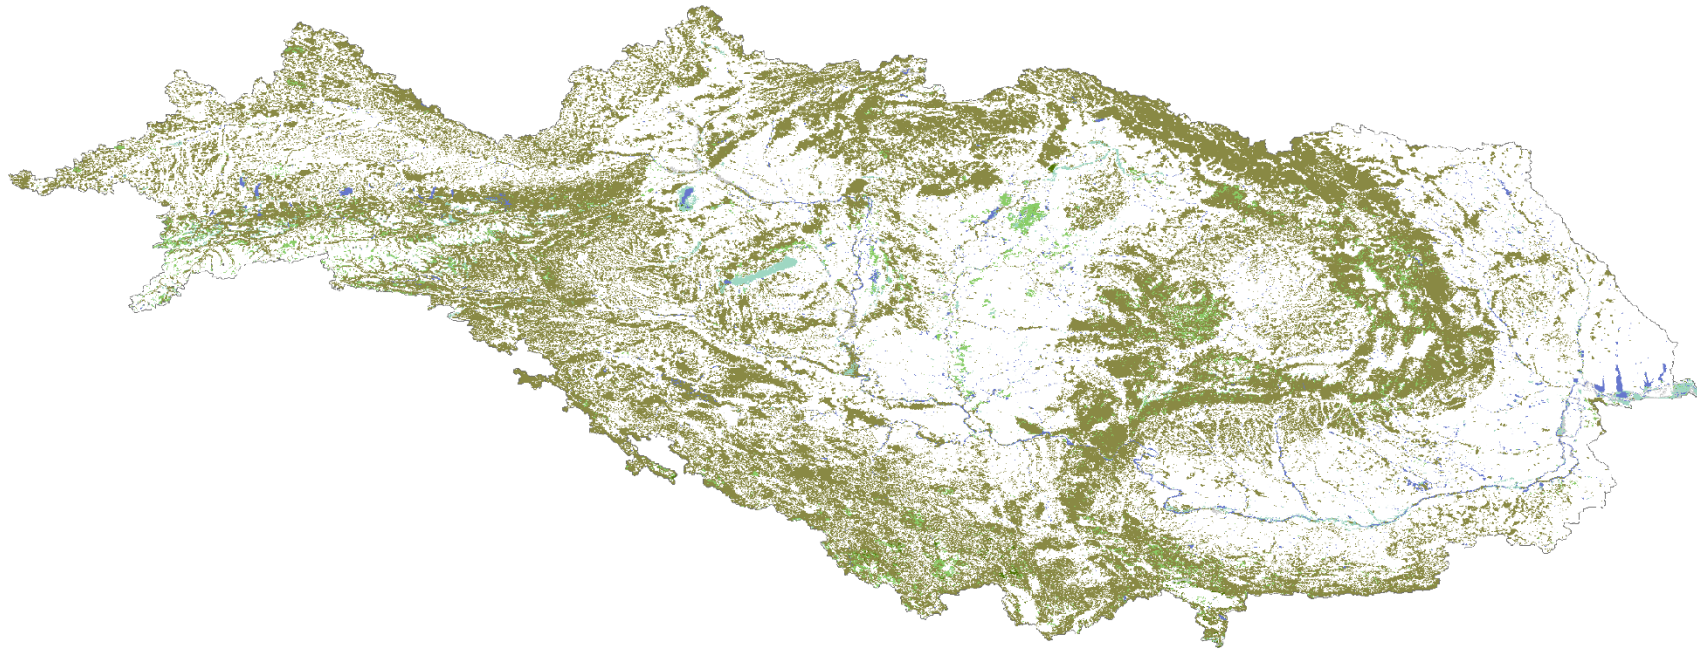

**Ecosystem groups**

-  Inland surface waters
-  Wetlands (mires, bogs and fens)
-  Grasslands
-  Heathland, shrub and tundra
-  Woodland, forest and other woodland
-  Complexes
-  Other habitats beyond our scope

Figure 3: Non-agriculturally used ecosystem groups in the Danube river basin according to the EWD typology

# Ecosystem groups and risk for GDEs from groundwater pumping in the Danube river basin

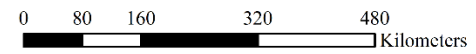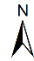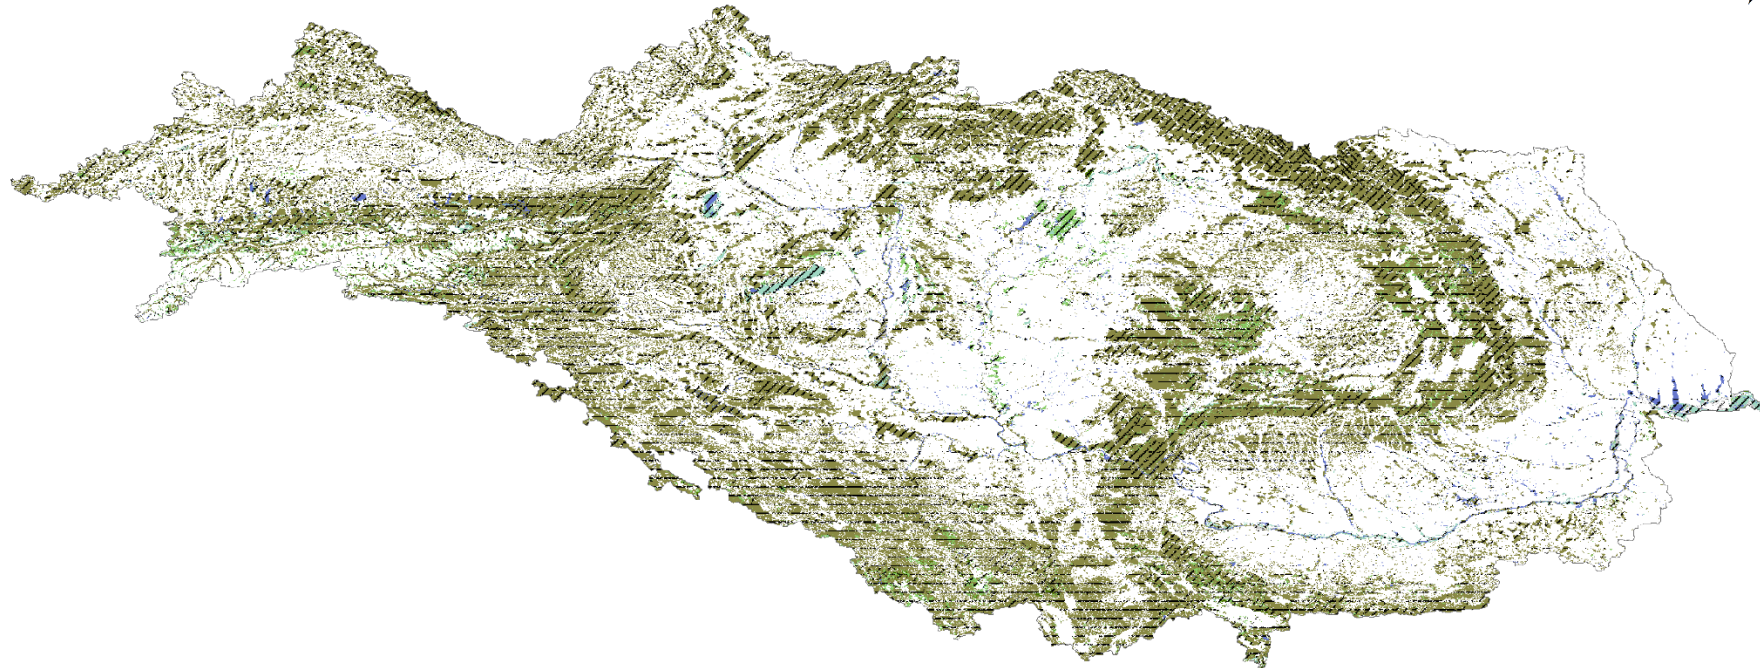

### Ecosystem groups

- Inland surface waters
- Wetlands (mires, bogs and fens)
- Grasslands
- Heathland, shrub and tundra
- Woodland, forest and other woodland
- Complexes
- Other habitats beyond our scope

### Potential risk to GDEs

- No identified risk
- Low
- Moderate
- High
- Very high

Figure 4: Ecosystem groups in the Danube river basin according to the EWD typology with potential risk for GDEs when groundwater pumping is in place.

Potential risk for GDEs in the Danube river basin from groundwater pumping

0 80 160 320 480 Kilometers

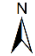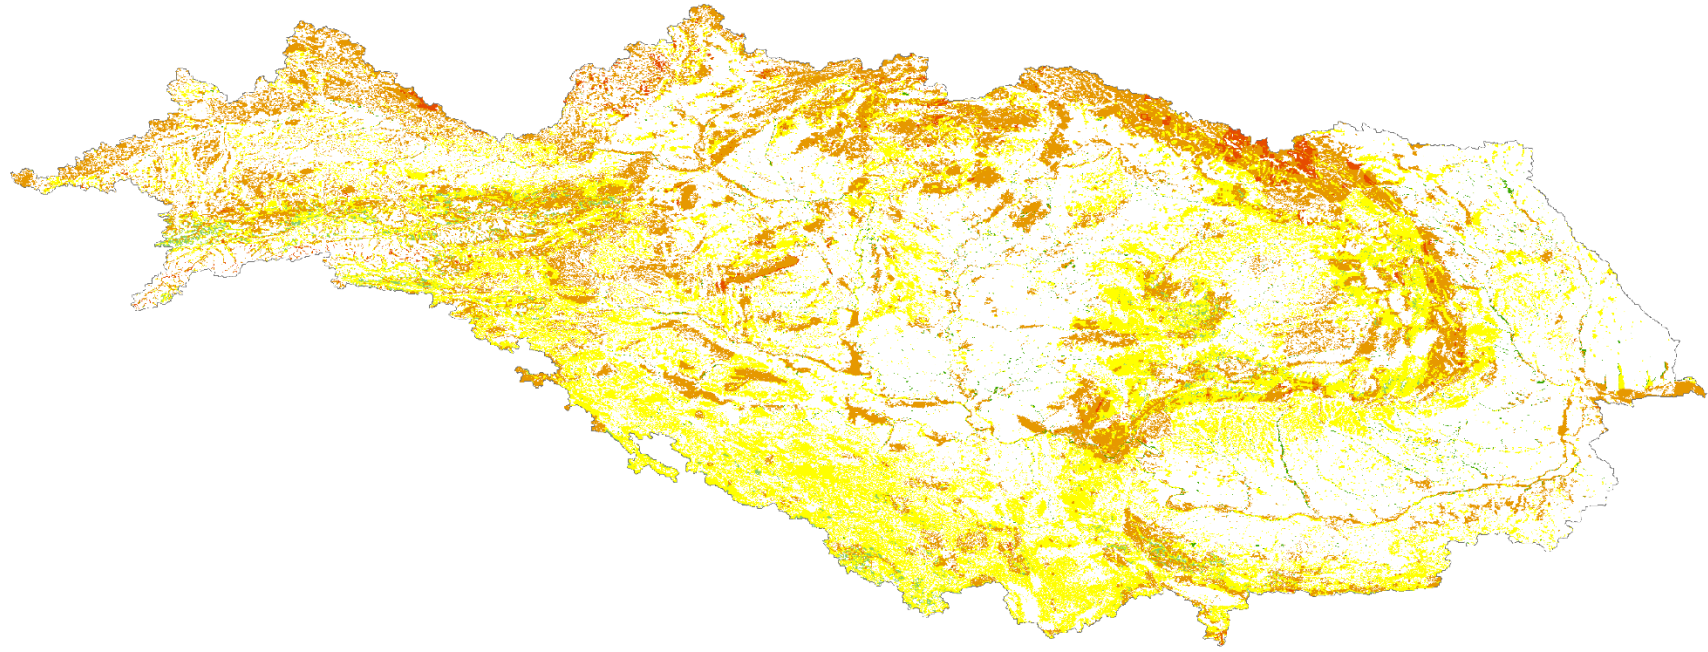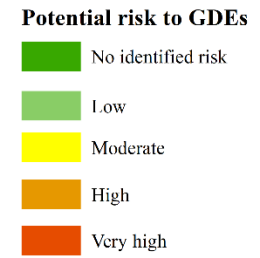

Figure 5: Potential risk for GDEs in the Danube river basin to be impacted when groundwater pumping takes place.
